# Supplementary material for: A chemoselective and continuous synthesis of m-sulfamoylbenzamide analogues
Source: publisher site journal article supplement (doi:10.3762/bjoc.13.33), 2017-02-16

# Supporting Information

for

## A chemoselective and continuous synthesis of *m*-sulfamoylbenzamide analogues

Arno Verlee<sup>1</sup>, Thomas Heugebaert<sup>1</sup>, Tom van der Meer<sup>2,3</sup>, Pavel I. Kerchev<sup>2,3</sup>, Frank Van Breusegem<sup>2,3</sup> and Christian V. Stevens<sup>1,\*</sup>

Address: <sup>1</sup>Department of Sustainable Organic Chemistry and Technology, Faculty of Bioscience Engineering, Ghent University, Campus Coupure, Coupure Links 653, B-9000 Ghent, Belgium, <sup>2</sup>Department of Plant Systems Biology, VIB, Ghent University, Technologiepark 927, B-9000 Ghent, Belgium and Department of Plant Biotechnology and Bioinformatics, Ghent University, Technologiepark 927, B-9052 Ghent, Belgium

Email: Christian V. Stevens - Chris.Stevens@UGent.be

\*Corresponding author

## Experimental part

### *Synthesis of compound 1*

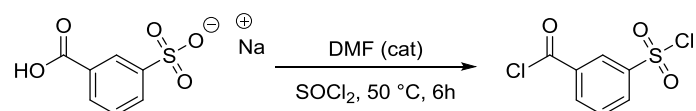

To a suspension of *m*-sulfobenzoic acid monosodium salt (10 g, 44.6 mmol) in thionyl chloride (200 mL), a catalytic amount of dimethylformamide (1 mL, 13.4 mmol) was added. Subsequently, the reaction was heated to 50 °C. After 6 hours, the reaction

mixture was filtered and the filtrate was concentrated in vacuo resulting in the desired final product. The compound was used without further purification.

Yellow oil (95%);  $^1\text{H-NMR}$  (400 MHz,  $\text{CDCl}_3$ ):  $\delta$  8.75 (m, 1H), 8.50 (ddd, 1H,  $J = 7.9, 1.6, 1.1$  Hz), 8.31-8.28 (ddd, 1H,  $J = 8.0, 1.6, 1.1$  Hz), 7.80 (dd, 1H  $J = 8.0$  Hz);  $^{13}\text{C-NMR}$  (100 MHz,  $\text{CDCl}_3$ ):  $\delta$  166.5 (C), 145.3 (C), 137.0 (CH), 135.0 (CH), 132.8 (C), 130.9 (CH), 129.4 (CH); IR (neat):  $\nu = 3076$  (w), 1753 (s), 1593 (m), 1377 (s), 1159 (s), 1082 (m), 997 (m), 930 (s), 806 (m), 689 (s), 660 (s), 571 (s)  $\text{cm}^{-1}$ .

#### Compound **3aa**

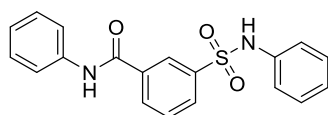

White solid (no further purification; 140 mg 95%); m.p. = 155 - 156  $^{\circ}\text{C}$ ;  $^1\text{H-NMR}$  (400 MHz,  $\text{DMSO-}d_6$ ):  $\delta$  10.48 (s, 1H), 10.41 (s, 1H), 8.34 (dd, 1H,  $J = 1.7$  Hz), 8.18 (ddd, 1H,  $J = 7.9, 1.7$  Hz), 7.92 (ddd, 1H,  $J = 7.8, 1.6$  Hz), 7.75 (d, 2H,  $J = 7.8$  Hz), 7.71 (dd, 1H,  $J = 7.9$  Hz), 7.37 (dd, 2H,  $J = 7.8$  Hz), 7.24 (dd, 2H,  $J = 7.8$  Hz), 7.16 – 7.09 (m, 3H), 7.03 (dd, 1H,  $J = 7.3$  Hz);  $^{13}\text{C-NMR}$  (100 MHz,  $\text{DMSO-}d_6$ ):  $\delta$  164.4 (C), 140.3 (C), 139.1 (C), 137.8 (C), 136.2 (C), 132.1 (CH), 129.8 (CH), 129.7 (CH), 129.6 (CH), 129.0 (CH), 126.5 (CH), 124.6 (CH), 124.4 (CH), 120.8 (CH), 120.6 (CH); IR (neat):  $\nu = 3379$  (w), 3136 (w), 3074 (w), 1655 (s), 1599 (m), 1533 (s), 1493 (m), 1445 (m), 1327 (m), 1159 (s), 1080 (m), 922 (m), 746 (s), 691 (s), 556 (s), 513 (m)  $\text{cm}^{-1}$ ; MS:  $m/z = 353.0$   $[\text{M}+\text{H}]^+$ .

#### Compound **3ab**

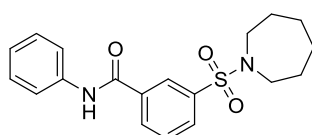

White crystals (recrystallization in methanol; 197 mg, 75%); m.p. = 160 – 161  $^{\circ}\text{C}$ ;  $^1\text{H-NMR}$  (400 MHz,  $\text{CDCl}_3$ ):  $\delta$  8.26 (dd, 1H,  $J = 1.4$  Hz), 8.13 (ddd, 1H,  $J = 1.3, 7.8$  Hz),

7.99 (s, br, 1H) 7.98 (ddd, 1H,  $J = 1.3, 7.7$  Hz), 7.70 – 7.65 (m, 3H), 7.45 – 7.39 (m, 2H), 7.24 – 7.19 (m, 1H), 3.33 (t, 4H,  $J = 5.9$  Hz), 1.75 (m, 4H), 1.66 – 1.60 (m, 4H);  $^{13}\text{C}$ -NMR (100 MHz,  $\text{CDCl}_3$ ):  $\delta$  164.9 (C), 140.4 (C), 138.0 (C), 136.6 (C), 131.9 (CH), 130.1 (CH), 129.5 (CH), 129.4 (CH), 125.5 (CH), 125.3 (CH), 121.0 (CH), 48.7 ( $\text{CH}_2$ ), 29.5 ( $\text{CH}_2$ ), 27.2 ( $\text{CH}_2$ ); IR (neat):  $\nu = 3311$  (w), 2918 (w), 2848 (w), 1651 (m), 1597 (m), 1530 (s), 1441 (m), 1329 (s), 1153 (s), 1038 (m), 743 (s), 687 (s), 565 (s), 513 (s)  $\text{cm}^{-1}$ ; MS:  $m/z = 359.1$   $[\text{M}+\text{H}]^+$ .

#### Compound **3ac**

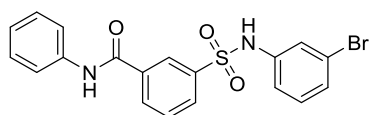

White-yellow solid (recrystallization in methanol; 94 mg, 78%); m.p. = 203 – 204 °C;  $^1\text{H}$ -NMR (400 MHz,  $\text{DMSO}-d_6$ ):  $\delta$  10.53 (s, 1H), 10.45 (s, 1H), 8.39 (dd, 1H,  $J = 1.6$  Hz), 8.24-8.22 (m, 1H), 7.99-7.96 (m, 1H), 7.81-7.79 (m, 2H), 7.76 (dd, 1H,  $J = 7.9$  Hz), 7.44-7.40 (m, 2H), 7.29-7.27 (m, 2H), 7.17-7.15 (m, 2H), 7.11-7.06 (m, 1H);  $^{13}\text{C}$ -NMR (100 MHz,  $\text{CDCl}_3$ ):  $\delta$  164.5 (C), 140.4 (C), 139.2 (C), 136.3 (C), 132.2 (CH), 129.9 (CH), 129.8 (CH), 129.7 (CH), 129.1 (CH), 126.6 (C), 124.8 (CH), 124.5 (CH), 120.96 (CH), 120.7 (CH); IR (neat):  $\nu = 3345$  (m), 3127 (w), 1645 (s), 1597 (m), 1524 (s), 1447 (s), 1393 (m), 1339 (m), 1263 (m), 1161 (s), 1124 (m), 951 (s), 878 (m), 762 (m), 677 (s), 588 (s), 507 (m)  $\text{cm}^{-1}$ ; MS:  $m/z = 430.9$   $[\text{M}+\text{H}]^+$ ; 433.0  $[\text{M}+\text{H}]^+$ .

#### Compound **3ae**

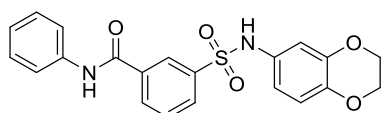

White solid (column chromatography: 55% Ethyl acetate:hexane; 92 mg, 76%); m.p. = 165 – 166 °C;  $^1\text{H}$ -NMR (400 MHz,  $\text{CDCl}_3$ ):  $\delta$  8.30 (dd, 1H,  $J = 1.6$  Hz), 8.26 (s, br, 1H), 8.08-8.05 (m, 1H), 7.78-7.76 (m, 1H), 7.62-7.59 (m, 1H), 7.48 (dd, 1H,  $J = 7.9$

Hz), 7.28-7.23 (m, 2H), 7.26-7.25 (m, 1H), 7.16-7.11 (m, 1H), 6.69 (d, 1H,  $J = 8.7$  Hz), 6.67 (d, 1H,  $J = 2.5$  Hz), 6.53 (dd, 1H,  $J = 8.5, 2.5$  Hz), 4.17-4.16 (m, 4H);  $^{13}\text{C}$ -NMR (100 MHz,  $\text{CDCl}_3$ ):  $\delta$  164.2 (C), 143.7 (C), 142.2 (C), 139.5 (C), 137.5 (C), 135.9 (C), 134.2 (CH), 132.2 (CH), 130.3 (CH), 129.6 (CH), 129.1 (C), 129.1 (CH), 125.4 (CH), 125.0 (CH), 120.7 (CH), 117.6 (CH), 117.0 (CH), 113.1 (CH), 64.2 ( $\text{CH}_2$ ), 64.2 ( $\text{CH}_2$ ); IR (neat):  $\nu = 3368$  (w), 3138 (w), 1649 (m), 1599 (m), 1533 (m), 1503 (m), 1445 (m), 1339 (m), 1300 (m), 1258 (m), 1157 (s), 1065 (m), 883.4 (m), 758 (m), 681 (s), 590 (s), 554 (s), 503 (m)  $\text{cm}^{-1}$ ; MS:  $m/z = 411.0$   $[\text{M}+\text{H}]^+$ .

### Compound **3ag**

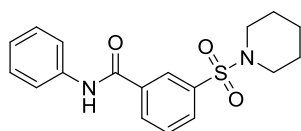

White-yellow solid (recrystallization in methanol; 88 mg, 74%); m.p. = 158 – 159 °C;  $^1\text{H}$ -NMR (400 MHz,  $\text{CDCl}_3$ ):  $\delta$  8.20 (dd, 1H,  $J = 1.6$  Hz), 8.16-8.13 (m, 1H), 8.01 (s, br, 1H), 7.93-7.90 (m, 1H), 7.70-7.65 (m, 3H), 7.42-7.37 (m, 2H), 7.21-7.17 (m, 1H), 3.02 (t, 4H,  $J = 5.4$  Hz), 1.64 (tt, 4H,  $J = 5.6$  Hz), 1.45-1.40 (m, 2H);  $^{13}\text{C}$ -NMR (100 MHz,  $\text{CDCl}_3$ ):  $\delta$  164.2 (C), 137.5 (C), 137.2 (C), 136.2 (C), 131.7 (CH), 130.5 (CH), 129.8 (CH), 129.2 (CH), 125.6 (CH), 125.1 (CH), 120.1 (CH), 47.0 ( $\text{CH}_2$ ), 25.1 ( $\text{CH}_2$ ), 23.4 ( $\text{CH}_2$ ); IR (neat):  $\nu = 3321$  (w), 2922 (w), 2851 (w), 1653 (s), 1597 (m), 1521 (s), 1323 (s), 1260 (m), 1161 (s), 1092 (m), 1053 (m), 932 (s), 812 (m), 773 (m), 745 (s), 681 (s), 608 (s), 579 (s)  $\text{cm}^{-1}$ ; MS:  $m/z = 345.0$   $[\text{M}+\text{H}]^+$ .

### Compound **3ca**

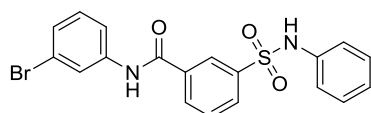

White solid (Column chromatography: 55% ethyl acetate:hexane; 83 mg, 70%); m.p. = 139 – 140 °C;  $^1\text{H}$ -NMR (400 MHz  $\text{DMSO}-d_6$ ):  $\delta$  10.62 (s, 1H), 10.42 (s, 1H), 8.34

(dd, 1H,  $J=1.6$  Hz), 8.19-8.17 (m, 1H), 8.08-8.07 (m, 1H), 7.96-7.93 (m, 1H), 7.75-7.70 (m, 2H), 7.35-7.33 (m, 2H), 7.27-7.22 (m, 2H), 7.12-7.10 (m, 2H), 7.06-7.02 (m, 1H);  $^{13}\text{C}$ -NMR (100 MHz, DMSO- $d_6$ ):  $\delta$  164.7 (C), 140.8 (C), 140.5 (C), 137.8 (C), 135.9 (C), 132.3 (CH), 131.2 (CH), 130.1 (CH), 130.1 (CH), 129.7 (CH), 127.1 (CH), 126.6 (CH), 124.8 (CH), 123.2 (CH), 121.9 (C), 120.7 (CH), 119.7 (CH); IR (neat):  $\nu$  = 3377 (w), 3167 (w), 1659 (s), 1593 (m), 1528 (m), 1412 (m), 1346 (m), 1161 (s), 1076 (m), 918 (m), 779 (s), 748 (s), 696 (s), 588 (s), 544 (s), 466 (m)  $\text{cm}^{-1}$ ; MS:  $m/z$  = 431.0  $[\text{M}+\text{H}]^+$ , 433.0  $[\text{M}+\text{H}]^+$

### Compound **3cb**

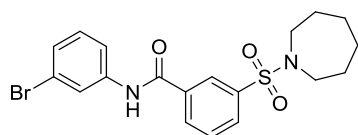

White crystals (recrystallization in methanol; 93 mg, 78%); m.p. = 152 – 153 °C  $^1\text{H}$ -NMR (400 MHz, DMSO- $d_6$ ):  $\delta$  8.25 (dd, 1H,  $J= 1.6$  Hz), 8.14-8.10 (m, 2H), 8.00-7.96 (m, 2H), 7.68 (dd, 1H,  $J= 7.8$  Hz), 7.61-7.59 (m, 1H), 7.35-7.33 (m, 1H), 7.29 (d, 1H,  $J= 7.8$  Hz), 3.32 (t, 4H,  $J= 5.9$  Hz), 1.78-1.71 (m, 4H), 1.64-1.60 (m, 4H);  $^{13}\text{C}$ -NMR (100 MHz, DMSO- $d_6$ ):  $\delta$  164.3 (C), 140.4 (C), 138.8 (C), 135.7 (C), 131.4 (CH), 130.4 (CH), 130.0 (CH), 129.9 (CH), 128.0 (CH), 125.0(CH), 123.4 (CH), 122.8 (C), 118.8 (CH), 48.4 (CH<sub>2</sub>), 29.1 (CH<sub>2</sub>), 26.9 (CH<sub>2</sub>); IR (neat):  $\nu$ = 3292 (w), 3075 (w), 2934 (w), 2853 (w) 1651 (s), 1587 (m), 1414 (m), 1332 (s), 1159 (s), 876 (m), 773 (s), 687 (s), 582 (s), 567 (s)  $\text{cm}^{-1}$ ; MS:  $m/z$ = 437.0  $[\text{M}+\text{H}]^+$ , 439.0  $[\text{M}+\text{H}]^+$ .

### Compound **3cc**

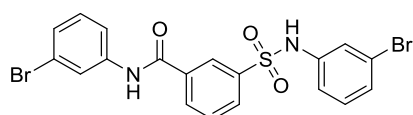

Yellow solid (no further purification; 118 mg, 99%); m.p. = 188 – 189 °C;  $^1\text{H}$ -NMR (400 MHz, DMSO- $d_6$ ):  $\delta$  10.71 (s, 1H), 10.63 (s, 1H), 8.36 (dd, 1H,  $J= 1.7$  Hz), 8.22-

8.20 (m, 1H), 8.08-8.06 (m, 1H), 7.97 (ddd, 1H,  $J$  = 7.9, 1.7, 1.0 Hz), 7.75 (dd, 1H,  $J$  = 7.7 Hz), 7.75-7.72 (m, 1H), 7.37-7.33 (m, 2H), 7.28-7.27 (m, 1H), 7.23-7.19 (m, 2H), 7.14-7.12 (m, 1H);  $^{13}\text{C}$ -NMR (100 MHz, DMSO- $d_6$ ): 164.6 (C), 140.8 (C), 140.1 (C), 139.6 (C), 136.0 (C), 132.6 (CH), 131.8 (CH), 131.2 (CH), 130.3 (CH), 130.0 (CH), 127.4 (CH), 127.1 (CH), 126.6 (CH), 123.2 (CH), 122.6 (CH), 122.3 (C), 121.9 (C), 119.7 (CH), 119.1 (CH); IR (neat):  $\nu$  = 3375 (w), 3146 (w), 1657 (m), 1589 (m), 1526 (m), 1477 (m), 1335 (m), 1159 (s), 1072 (m), 883 (m), 777 (s), 707 (m), 590 (s), 436 (m)  $\text{cm}^{-1}$ ; MS:  $m/z$  = 508.8  $[\text{M}+\text{H}]^+$ , 510.9  $[\text{M}+\text{H}]^+$ .

### Compound **3ce**

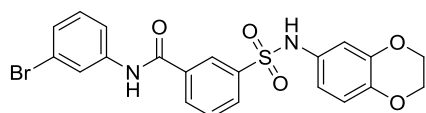

White-brown solid (column chromatography: 55% ethyl acetate:hexane; 97 mg, 81%); m.p. = 145 – 146 °C;  $^1\text{H}$ -NMR (400 MHz, DMSO- $d_6$ ):  $\delta$  10.62 (s, 1H), 10.10 (s, 1H), 8.29 (dd, 1H,  $J$  = 1.6 Hz), 8.20-8.17 (m, 1H), 8.08-8.07 (m, 1H), 7.90 (ddd, 1H,  $J$  = 7.9, 1.6, 1.0 Hz), 7.76-7.71 (m, 2H), 7.37-7.31 (m, 2H), 6.71 (d, 1H,  $J$  = 8.6 Hz), 6.58 (d, 1H,  $J$  = 2.4 Hz), 6.54 (dd, 1H,  $J$  = 8.6, 2.5 Hz), 4.17-4.13 (m, 4H);  $^{13}\text{C}$ -NMR (100 MHz, DMSO- $d_6$ ):  $\delta$  164.8 (C), 143.7 (C), 141.2 (C), 140.9 (C), 140.4 (C), 135.8 (C), 132.2 (CH), 131.2 (CH), 130.9 (C), 130.1 (CH), 130.0 (CH), 127.1 (CH), 126.6 (CH), 123.2 (CH), 121.9 (C), 119.7 (C), 117.8 (CH), 115.1 (CH), 111.0 (CH), 64.5 ( $\text{CH}_2$ ), 64.3 ( $\text{CH}_2$ ); IR (neat):  $\nu$  = 3333 (w), 3118 (w), 2965 (w), 2878 (w), 1649 (m), 1593 (m), 1510 (s), 1333 (m), 1254 (m), 1157 (s), 1070 (m), 980 (m), 856 (m), 775 (s), 675 (s), 583 (s), 490 (m)  $\text{cm}^{-1}$ ; MS:  $m/z$  = 488.9  $[\text{M}+\text{H}]^+$ , 490.9  $[\text{M}+\text{H}]^+$ .

### Compound **3cg**

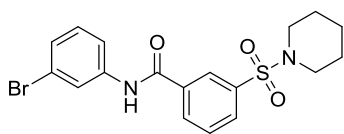

White crystals (recrystallization in methanol; 92 mg, 77%); m.p. = 167 – 168 °C;  $^1\text{H}$ -NMR (400 MHz,  $\text{CDCl}_3$ ):  $\delta$  8.41 (s, br, 1H), 8.20 (dd, 1H,  $J$  = 1.6 Hz), 8.16-8.13 (m, 1H), 7.97 (dd, 1H,  $J$  = 1.7 Hz), 7.90-7.87 (m, 1H), 7.67 (dd, 1H,  $J$  = 7.8 Hz), 7.61 (d, 1H,  $J$  = 8.0 Hz), 7.32-7.29 (m, 1H), 7.24 (dd, 1H,  $J$  = 8.0 Hz), 2.99 (t, 4H,  $J$  = 5.4 Hz), 1.61 (tt, 4H,  $J$  = 5.6 Hz), 1.41 (tt, 2H,  $J$  = 5.7 Hz);  $^{13}\text{C}$ -NMR (100 MHz,  $\text{CDCl}_3$ ):  $\delta$  164.4 (C), 138.9 (C), 137.0 (C), 135.8 (C), 132.0 (CH), 130.6 (CH), 130.4 (CH), 129.8 (CH), 127.9 (CH), 125.7 (CH), 123.5 (CH), 122.7 (C), 119.1 (CH), 47.0 ( $\text{CH}_2$ ), 25.1 ( $\text{CH}_2$ ), 23.4 ( $\text{CH}_2$ ); IR (neat):  $\nu$  = 3296 (w), 2947 (w), 2845 (w), 1653 (m), 1589 (m), 1520 (m), 1476 (m), 1414 (m), 1337 (s), 1294 (m), 1161 (s), 1051 (m), 935 (s), 775 (s), 685 (s), 571 (s), 486 (m)  $\text{cm}^{-1}$ ; MS:  $m/z$  = 423.0  $[\text{M}+\text{H}]^+$ ; 425.0  $[\text{M}+\text{H}]^+$ .

### Compound **3ea**

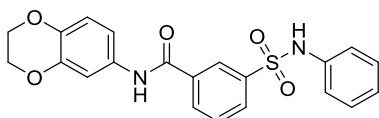

White-brown solid (column chromatography: 65% ethyl acetate: hexane; 96 mg, 80%); m.p. = 192 – 193 °C;  $^1\text{H}$ -NMR (400 MHz,  $\text{CDCl}_3$ ):  $\delta$  8.20 (dd, 1H,  $J$  = 1.5 Hz), 8.08-8.05 (m, 1H), 7.87-7.84 (m, 1H), 7.68 (s, br, 1H), 7.54 (dd, 1H,  $J$  = 7.9 Hz), 7.29-7.25 (m, 2H), 7.23 (d, 1H,  $J$  = 2.0 Hz), 7.19-7.15 (m, 1H), 7.11-7.08 (m, 1H), 6.98 (dd, 1H,  $J$  = 8.8, 2.2 Hz), 6.84 (d, 1H,  $J$  = 8.7 Hz), 4.28-4.24 (m, 4H);  $^{13}\text{C}$ -NMR (100 MHz,  $\text{CDCl}_3$ ):  $\delta$  164.0 (C), 143.5 (C), 141.0 (C), 139.5 (C), 136.1 (C), 136.0 (C), 132.1 (CH), 131.0 (C), 130.1 (CH), 129.5 (CH), 129.4 (CH), 125.9 (CH), 125.4 (CH), 122.4 (CH), 117.3 (CH), 114.3 (CH), 110.5 (CH), 64.4 ( $\text{CH}_2$ ), 64.3 ( $\text{CH}_2$ ); IR (neat):  $\nu$  = 3389 (w), 3076 (w), 2889 (w), 1639 (s), 1597 (m), 1506 (s), 1429 (m), 1342 (m), 1157

(s), 1065 (s), 920 (s), 889 (s), 767 (m), 729 (m), 679 (s), 543 (m)  $\text{cm}^{-1}$ ; MS:  $m/z$  = 411.0  $[\text{M}+\text{H}]^+$ .

#### Compound **3eb**

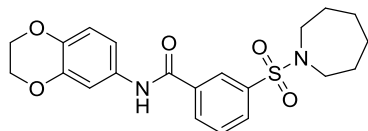

White crystals (recrystallization in methanol; 94 mg, 78%); m.p. = 115 – 116 °C;  $^1\text{H}$ -NMR (400 MHz,  $\text{CDCl}_3$ ):  $\delta$  8.2 (dd, 1H,  $J$  = 1.6 Hz), 8.09-8.07 (m, 1H), 7.95-7.92 (m, 1H), 7.83 (s, br, 1H), 7.63 (dd, 1H,  $J$  = 7.8 Hz), 7.29 (d, 1H,  $J$  = 1.9 Hz), 7.03 (dd, 1H,  $J$  = 8.7, 2.1 Hz), 6.86 (d, 1H,  $J$  = 8.7 Hz), 4.28-4.25 (m, 4H), 3.29 (t, 4H,  $J$  = 5.9 Hz), 1.75-1.69 (m, 4H), 1.61-1.57 (m, 4H)  $^{13}\text{C}$ -NMR (100 MHz,  $\text{CDCl}_3$ ):  $\delta$  164.0 (C), 143.6 (C), 141.0 (C), 140.3 (C), 136.2 (C), 131.3 (C), 131.1 (CH), 129.8 (CH), 129.7 (CH), 124.9 (CH), 117.4 (CH), 114.1 (CH), 110.3 (CH), 64.4 ( $\text{CH}_2$ ), 64.3 ( $\text{CH}_2$ ), 48.4 ( $\text{CH}_2$ ), 29.1 ( $\text{CH}_2$ ), 26.9 ( $\text{CH}_2$ ); IR (neat):  $\nu$  = 3302 (w), 2920 (w), 2853 (w), 1641 (m), 1607 (s), 1506 (s), 1412 (s), 1328 (s), 1279 (s), 1152 (s), 1069 (s), 920 (m), 862 (m), 733 (m), 577 (s)  $\text{cm}^{-1}$ ; MS:  $m/z$  = 417.0  $[\text{M}+\text{H}]^+$ .

#### Compound **3ec**

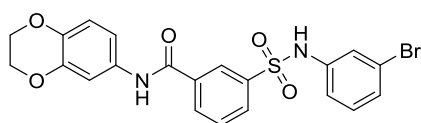

White-yellow solid (column chromatography: 60% ethyl acetate: hexane; 87 mg, 72%); m.p. = /;  $^1\text{H}$ -NMR (400 MHz,  $\text{CDCl}_3$ ):  $\delta$  8.52 (s, br, 1H), 8.47 (m, 1H), 8.04-8.01 (m, 1H), 7.77-7.74 (m, 1H), 7.41 (dd, 1H,  $J$  = 7.8 Hz), 7.32-7.31 (m, 1H), 7.19-7.16 (m, 2H), 7.05-7.02 (m, 2H), 7.00-6.97 (m, 1H), 6.74 (d, 1H,  $J$  = 8.7 Hz), 4.18-4.17 (m, 4H);  $^{13}\text{C}$ -NMR (100 MHz,  $\text{CDCl}_3$ ):  $\delta$  164.3 (C), 143.4 (C), 141.0 (C), 139.6 (C), 138.4 (C), 136.0 (C), 132.1 (CH), 131.0 (C), 130.6 (CH), 130.1 (CH), 129.4 (CH), 128.2 (CH), 125.6 (CH), 124.6 (CH), 122.7 (C), 120.3 (CH), 117.2 (CH), 114.6 (CH), 110.8



(CH), 64.4 (CH<sub>2</sub>), 64.3 (CH<sub>2</sub>); IR (neat):  $\nu$  = 3271 (w), 2930 (w), 1649 (m), 1593 (m), 1506 (s), 1477 (m), 1333 (m), 1283 (m), 1159 (s), 1066 (m), 921 (m), 887 (m), 736 (m), 682 (m), 586 (m), cm<sup>-1</sup>; MS:  $m/z$  = 488.9 [M+H]<sup>+</sup>; 490.9 [M+H]<sup>+</sup>

#### Compound **3ee**

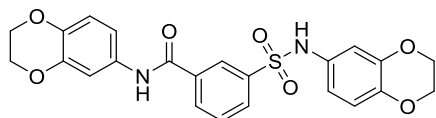

Brown solid (no further purification; 117 mg, 98%); m.p. = /; <sup>1</sup>H-NMR (400 MHz, CDCl<sub>3</sub>):  $\delta$  8.25 (dd, 1H,  $J$  = 1.5 Hz), 8.09-8.05 (m, 1H), 8.01 (s, br, 1H) 7.80-7.78 (m, 1H), 7.76 (s, br, 1H), 7.50 (dd, 1H,  $J$  = 7.8 Hz), 7.22 (d, 1H,  $J$  = 1.9 Hz), 7.05 (s, br, 1H), 7.01 (dd, 1H,  $J$  = 8.6, 2.0 Hz), 6.81 (d, 1H,  $J$  = 8.7 Hz), 6.70 (d, 1H,  $J$  = 8.6 Hz), 6.67 (d, 1H,  $J$  = 2.5 Hz), 6.52 (dd, 1H,  $J$  = 8.7, 2.6 Hz), 4.25-4.22 (m, 4H), 4.19-4.17 (m, 4H); <sup>13</sup>C-NMR (100 MHz, CDCl<sub>3</sub>):  $\delta$  163.9 (C), 143.7 (C), 143.756 (C), 142.734 (C), 141.0 (C), 139.4 (C), 135.9 (C), 132.1 (CH), 131.0 (C), 130.2 (CH), 129.5 (CH), 129.1 (C), 125.3 (CH), 117.6 (CH), 117.3 (CH), 117.1 (CH), 114.3 (CH), 113.2 (CH), 110.4 (CH), 64.4 (CH<sub>2</sub>), 64.3 (CH<sub>2</sub>), 64.2 (CH<sub>2</sub>), 64.17 (CH<sub>2</sub>); IR (neat):  $\nu$  = 3237 (s), 2932 (s), 1601 (m), 1502 (s), 1300 (m), 1281 (m), 1240 (m), 1204 (m), 1152 (s), 1063 (s), 966 (m), 920 (m), 885 (s), 808.17 (m), 681 (s), 621 (m), 580 (s), 548 (s) cm<sup>-1</sup>; MS:  $m/z$  = 469.0 [M+H]<sup>+</sup>.

#### Compound **3eg**

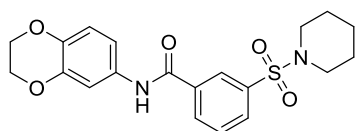

White solid (recrystallization in methanol; 93 mg, 77%); m.p. = 186 - 187 °C; <sup>1</sup>H-NMR (400 MHz, DMSO-d<sub>6</sub>):  $\delta$  10.35 (s, 1H), 8.27-8.23 (m, 2H), 7.93-7.91 (m, 1H), 7.80 (dd, 1H,  $J$  = 7.8 Hz), 7.38 (d, 1H,  $J$  = 2.4 Hz), 7.19 (dd, 1H,  $J$  = 8.7, 2.4 Hz), 6.85 (d, 1H,  $J$  = 8.7 Hz), 4.27-4.22 (m, 4H); <sup>13</sup>C-NMR (100 MHz, DMSO-d<sub>6</sub>):  $\delta$  164.0 (C),

143.3 (C), 140.4 (C), 136.5 (C), 136.4 (C), 132.8 (C), 132.4 (CH), 130.6 (CH), 126.7 (CH), 117.2 (CH), 114.4 (CH), 110.2 (CH), 64.6 (CH<sub>2</sub>), 64.4 (CH<sub>2</sub>), 47.1 (CH<sub>2</sub>), 25.1 (CH<sub>2</sub>), 23.4 (CH<sub>2</sub>); IR (neat):  $\nu$ = 3273 (w), 2941 (w), 2853 (w), 1643 (m), 1611 (m), 1506 (s), 1429 (m), 1416 (m), 1337 (s), 1300 (s), 1281 (s), 1242 (m), 1204 (m), 1180 (s), 1069 (s), 932 (s), 862 (m), 737 (m), 710 (s), 596 (s), 579 (s), 501 (m) cm<sup>-1</sup>; MS:  $m/z$ = 403.0 [M+H]<sup>+</sup>.

Compound 1

$^1\text{H}$ -NMR

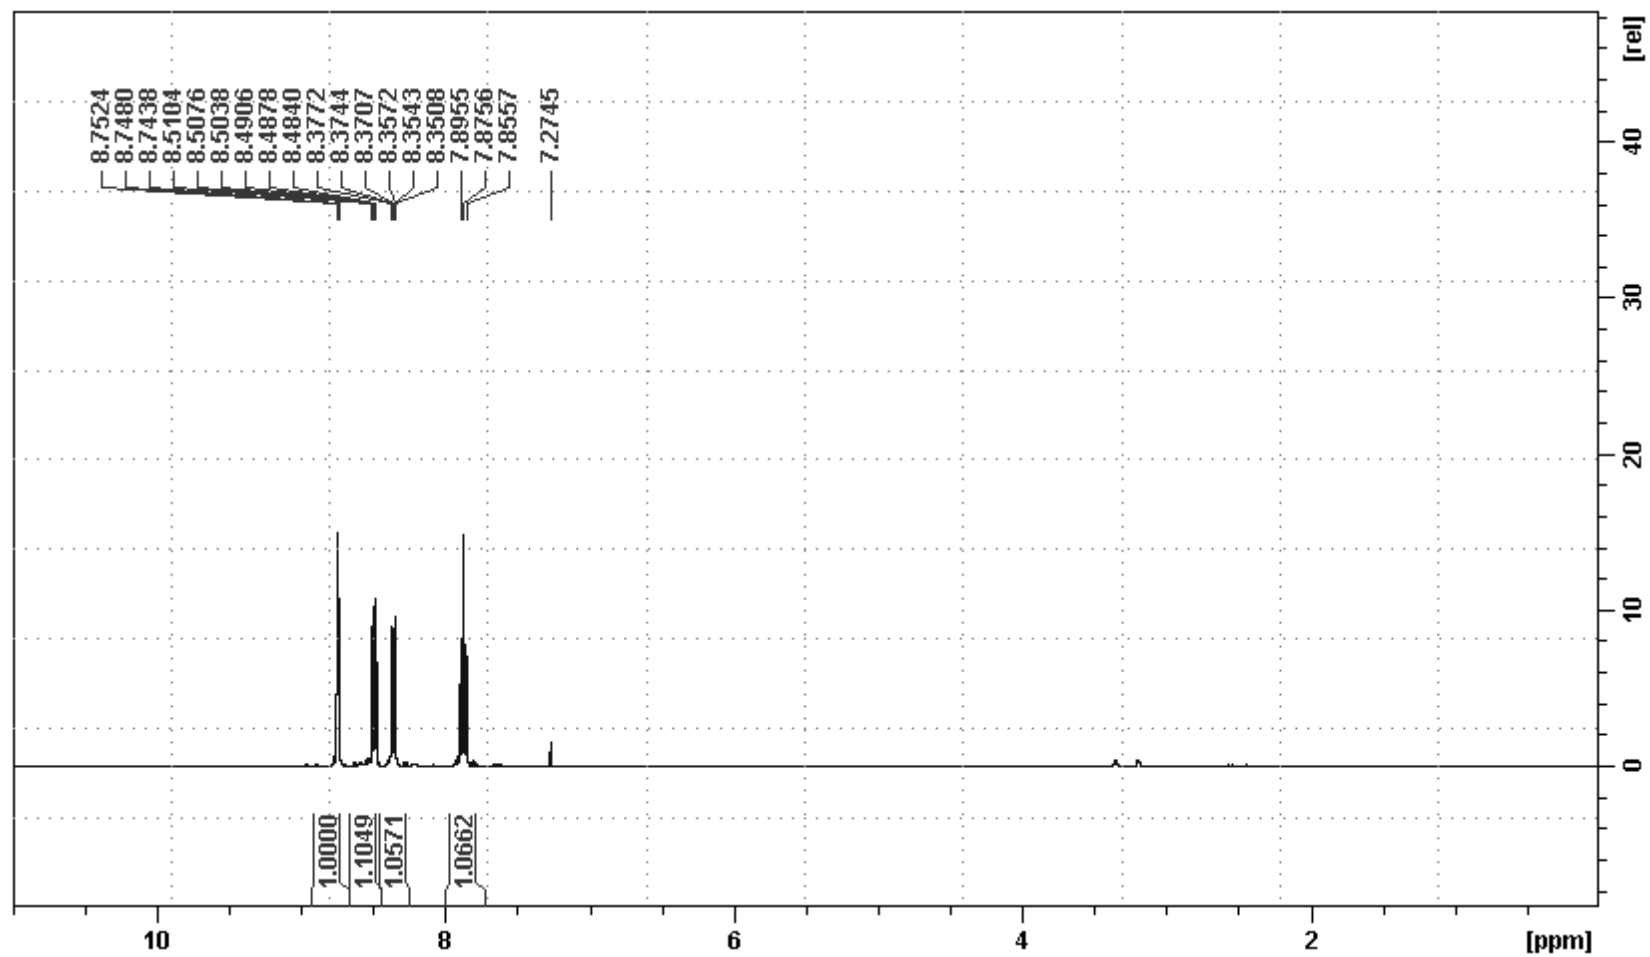

$^{13}\text{C}$ -NMR

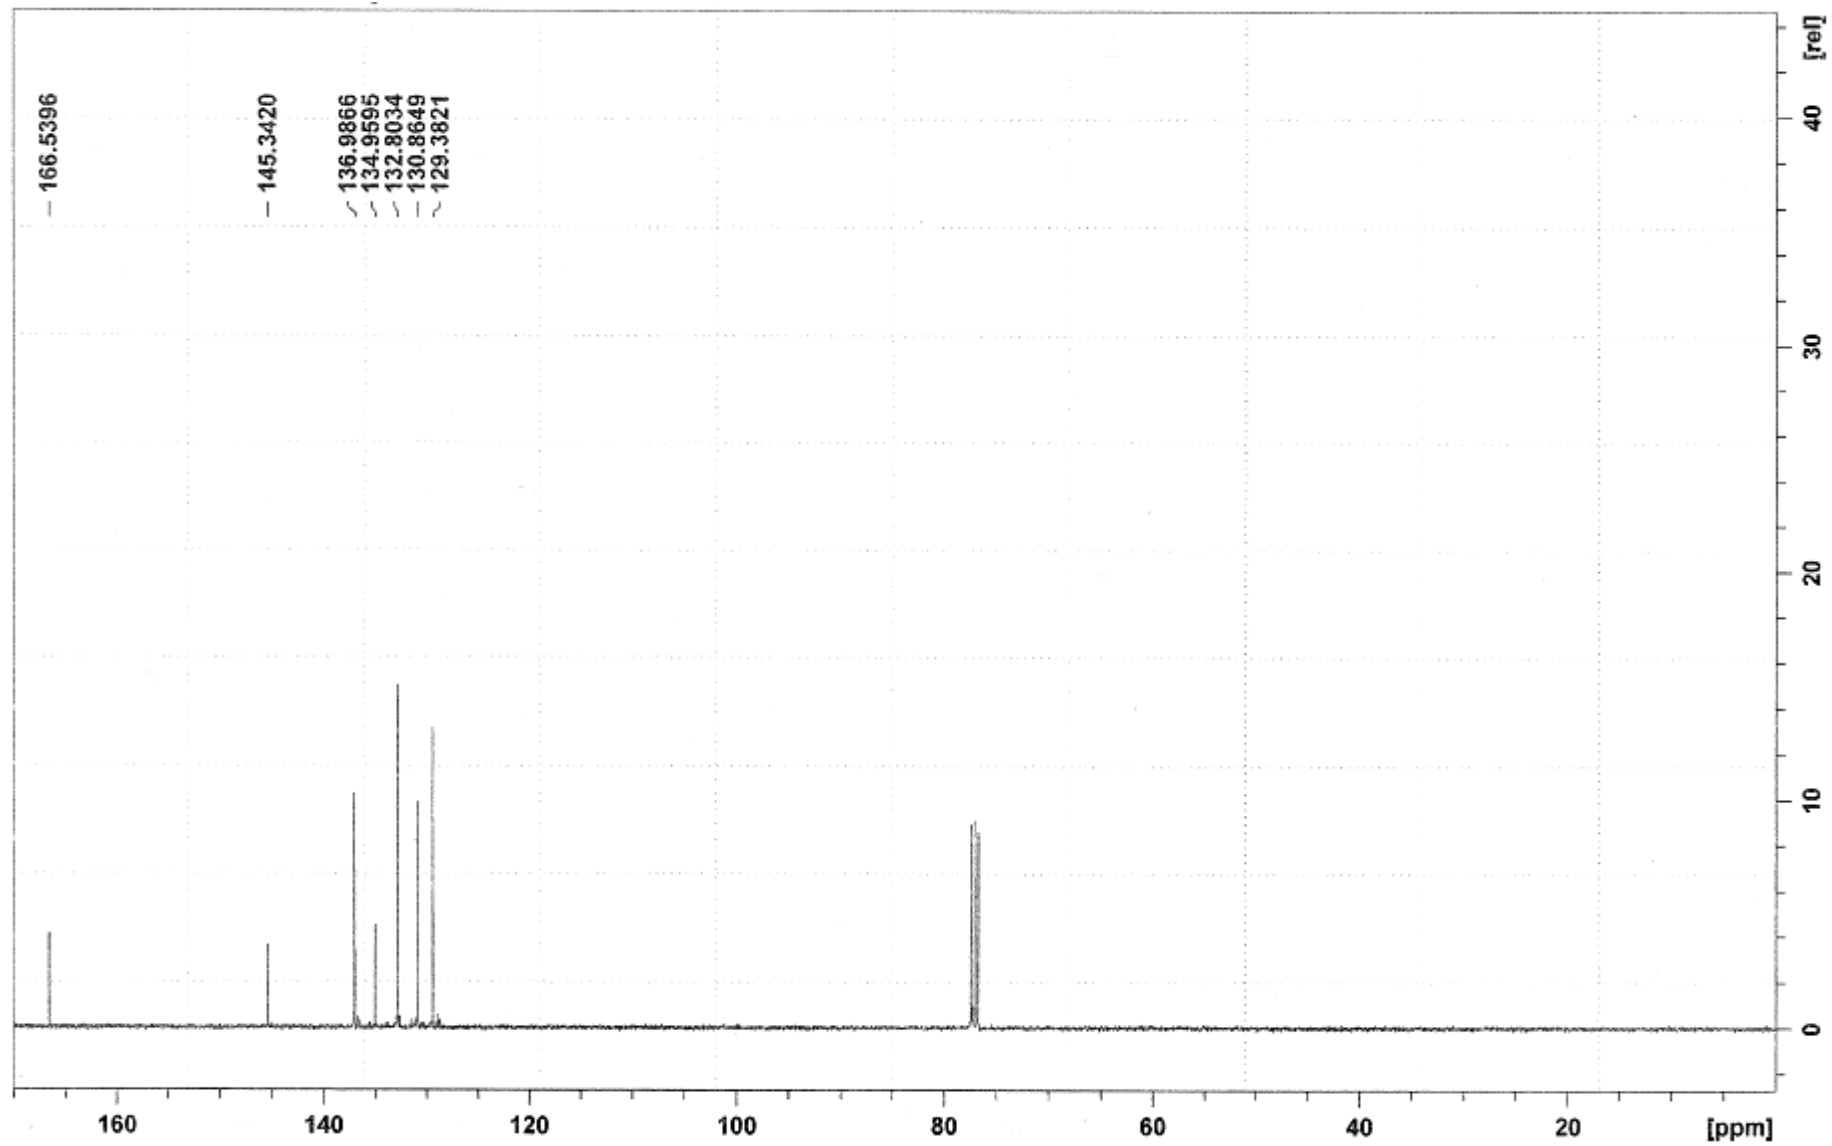

Compound **3aa**

$^1\text{H}$ -NMR

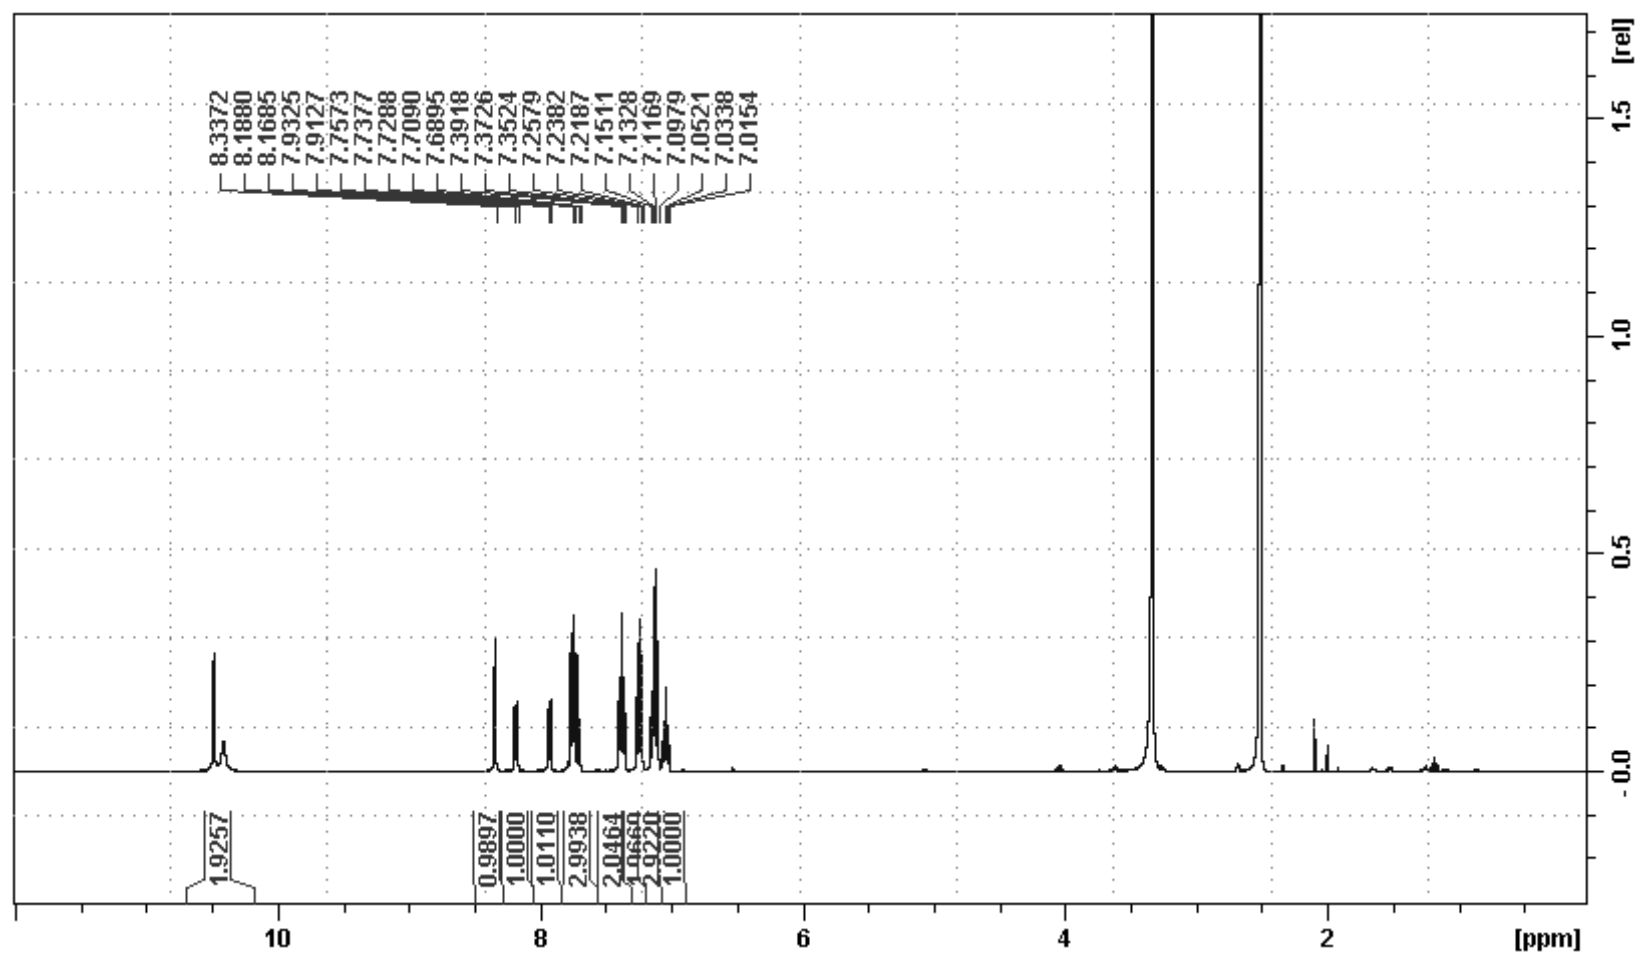

$^{13}\text{C}$ -NMR

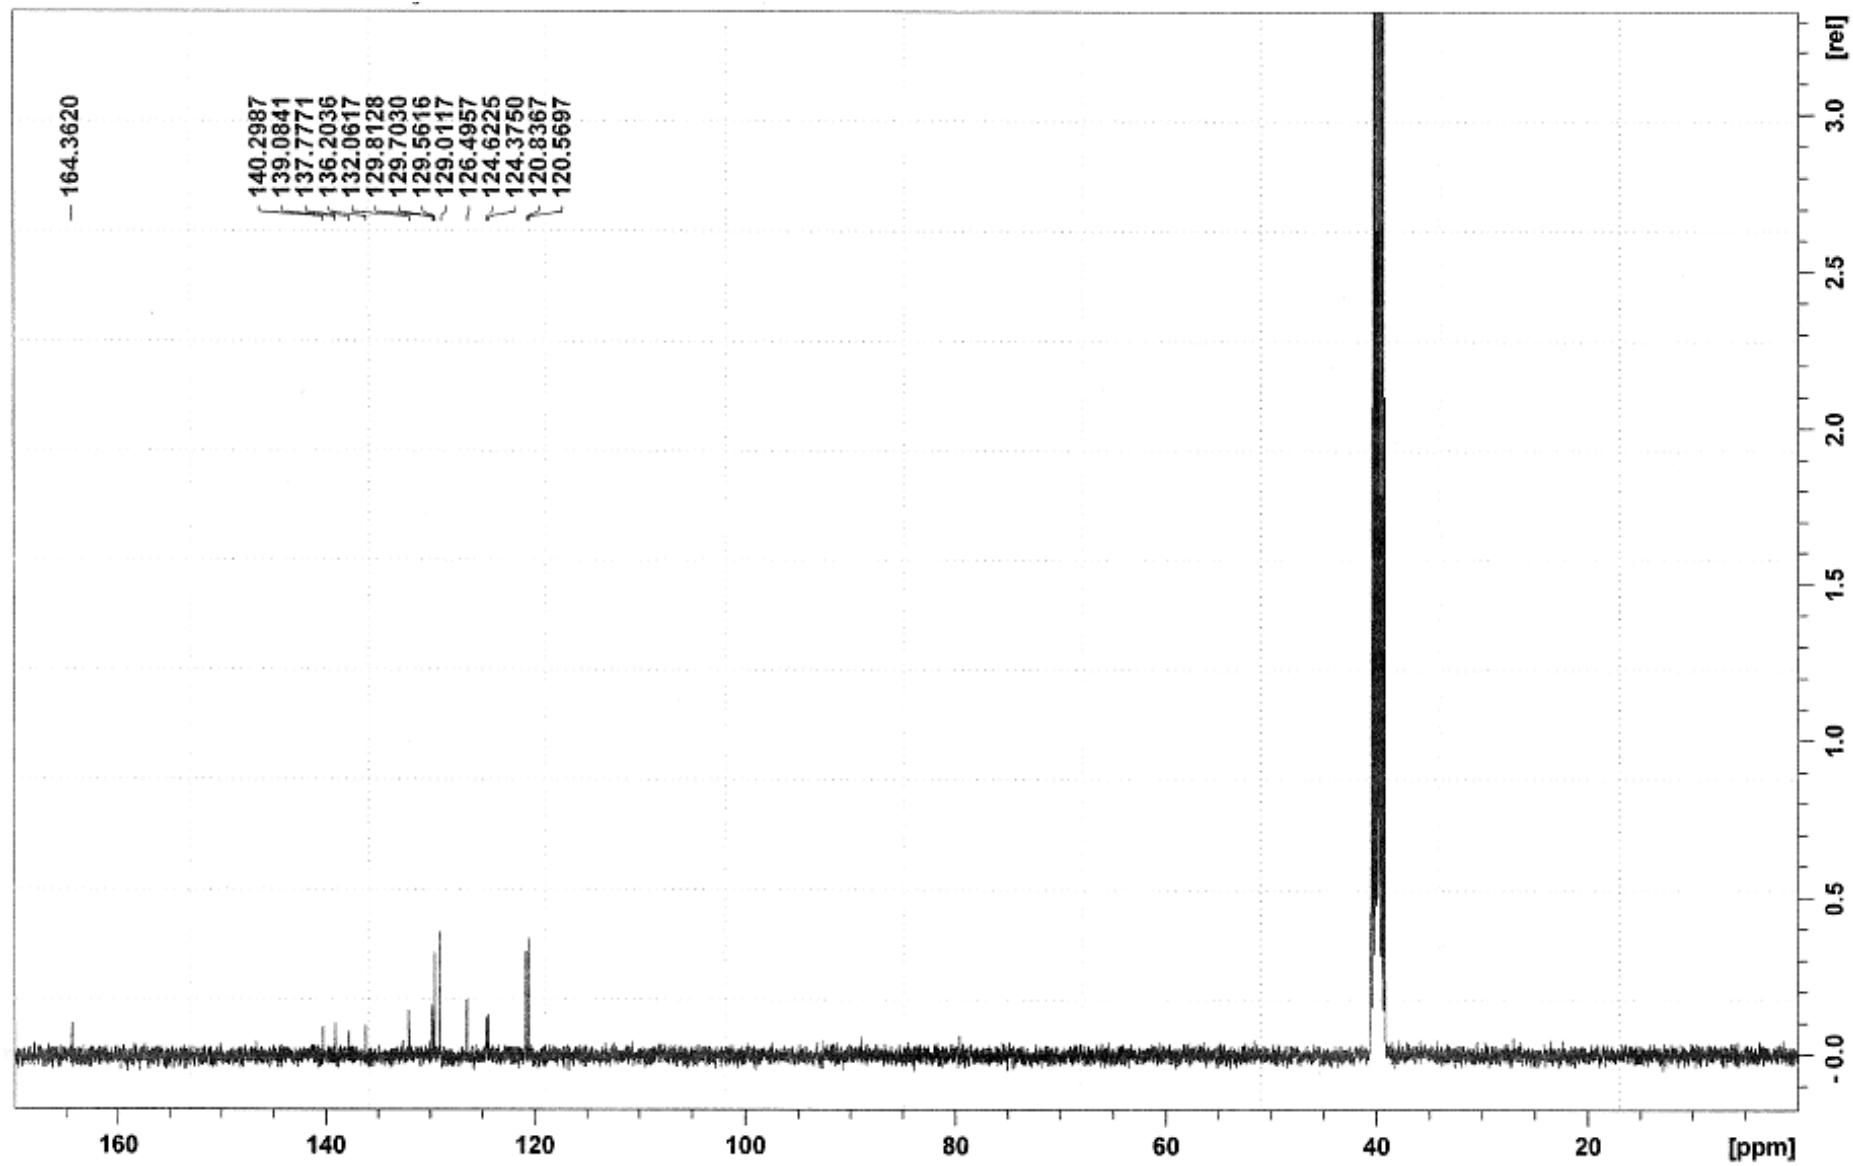

Compound **3ab**

$^1\text{H}$ -NMR

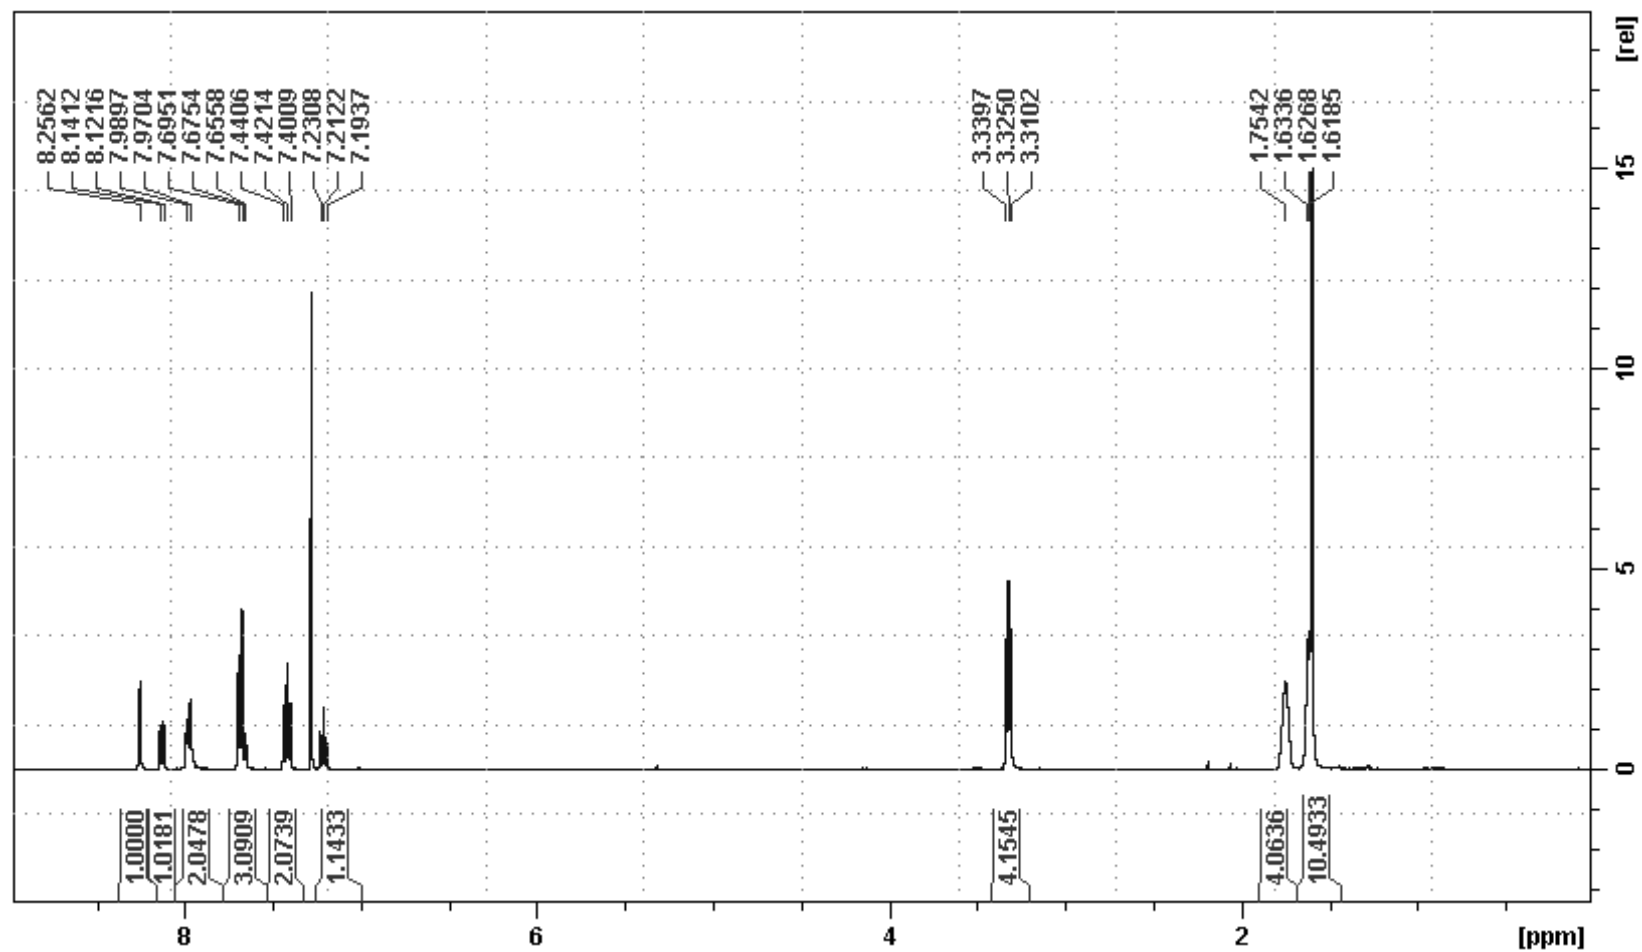

$^{13}\text{C}$ -NMR

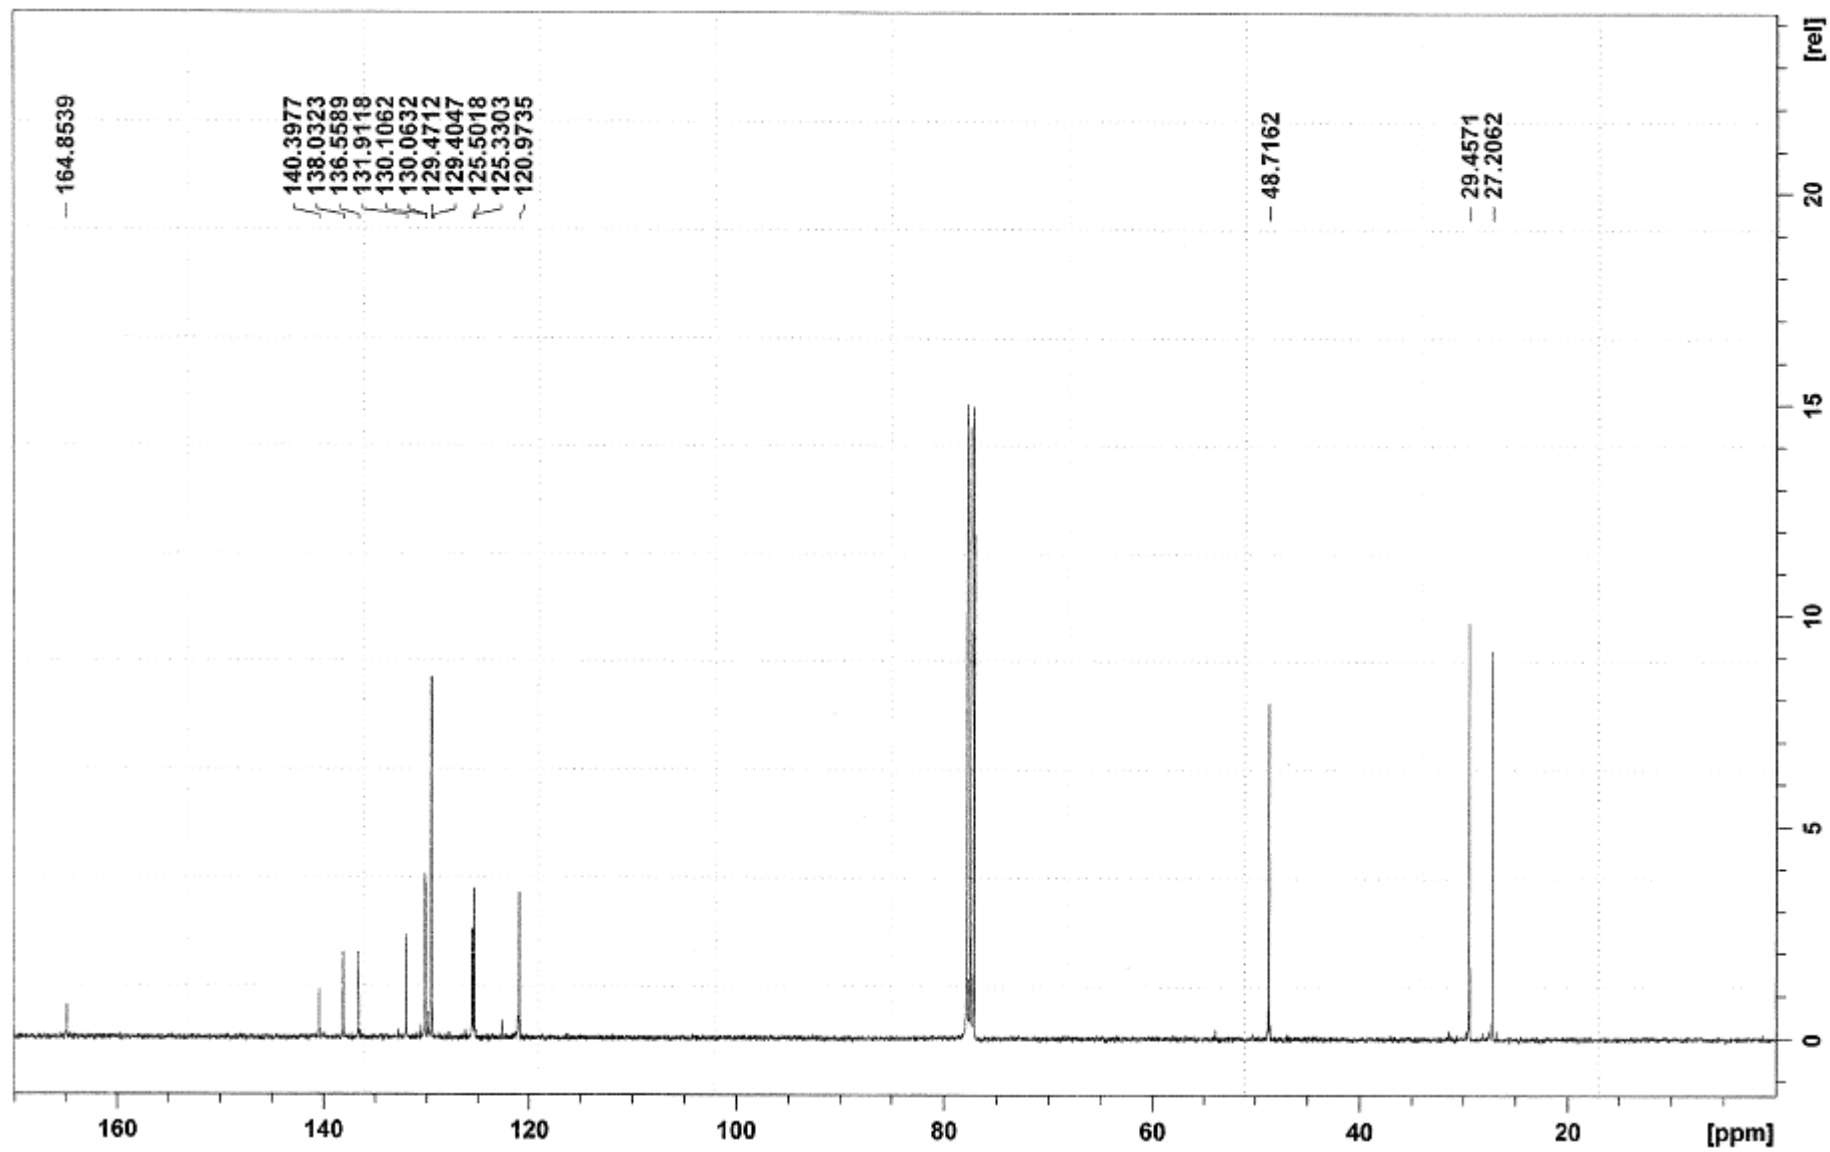



Compound **3ac**

$^1\text{H}$ -NMR

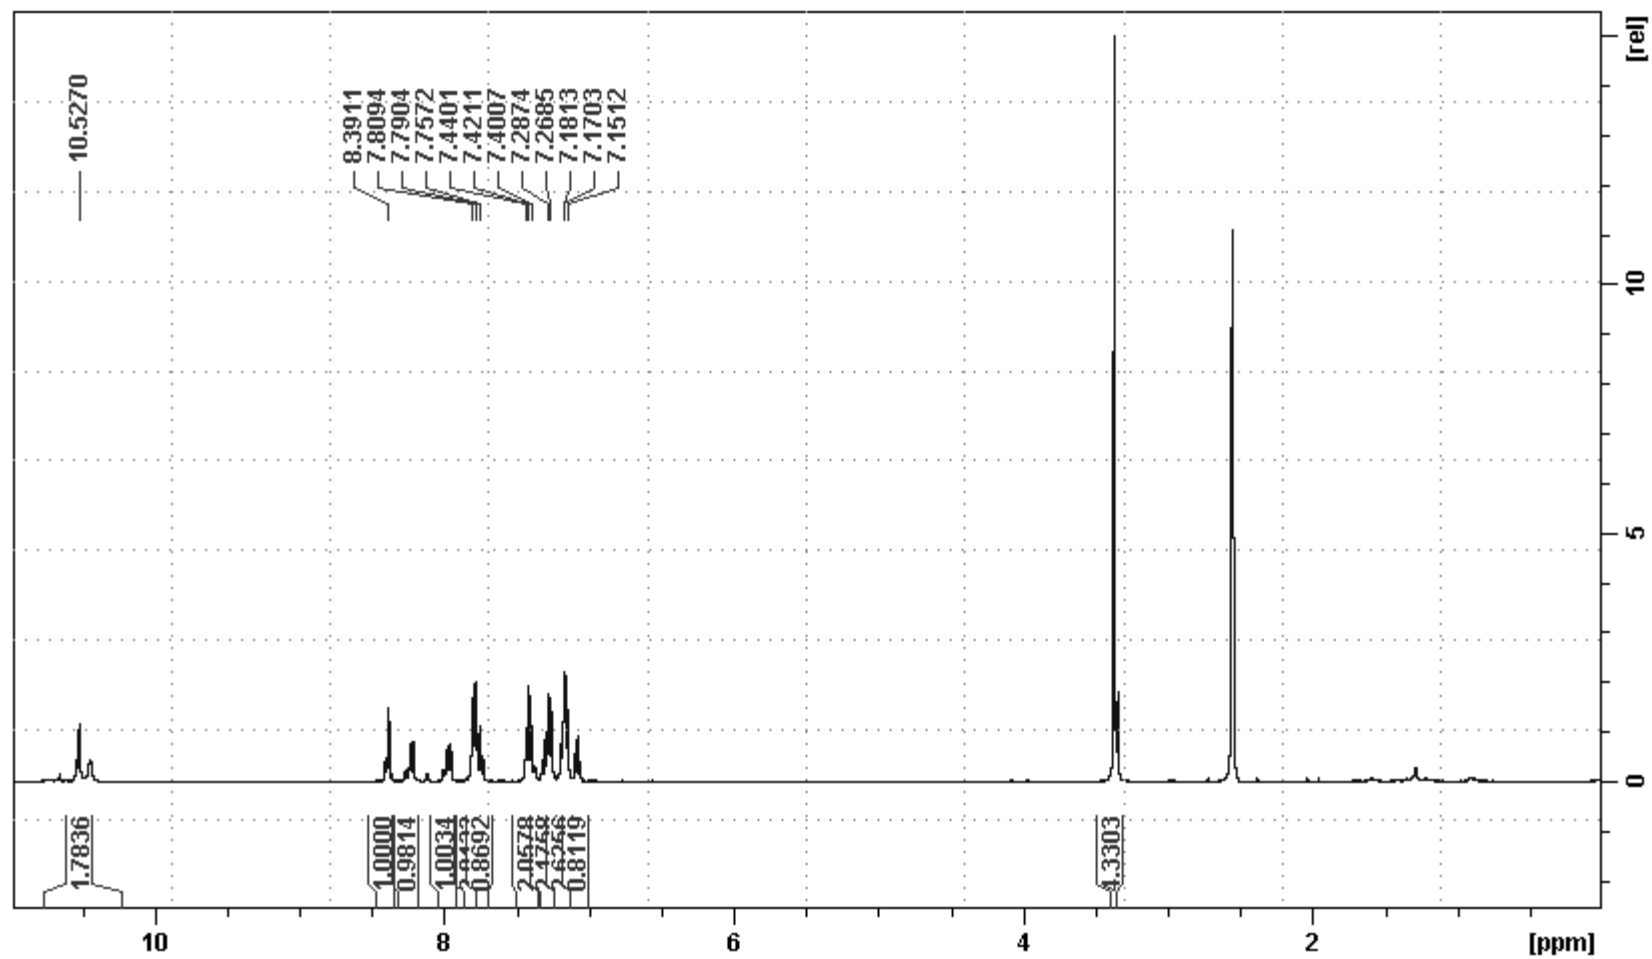

$^{13}\text{C}$ -NMR

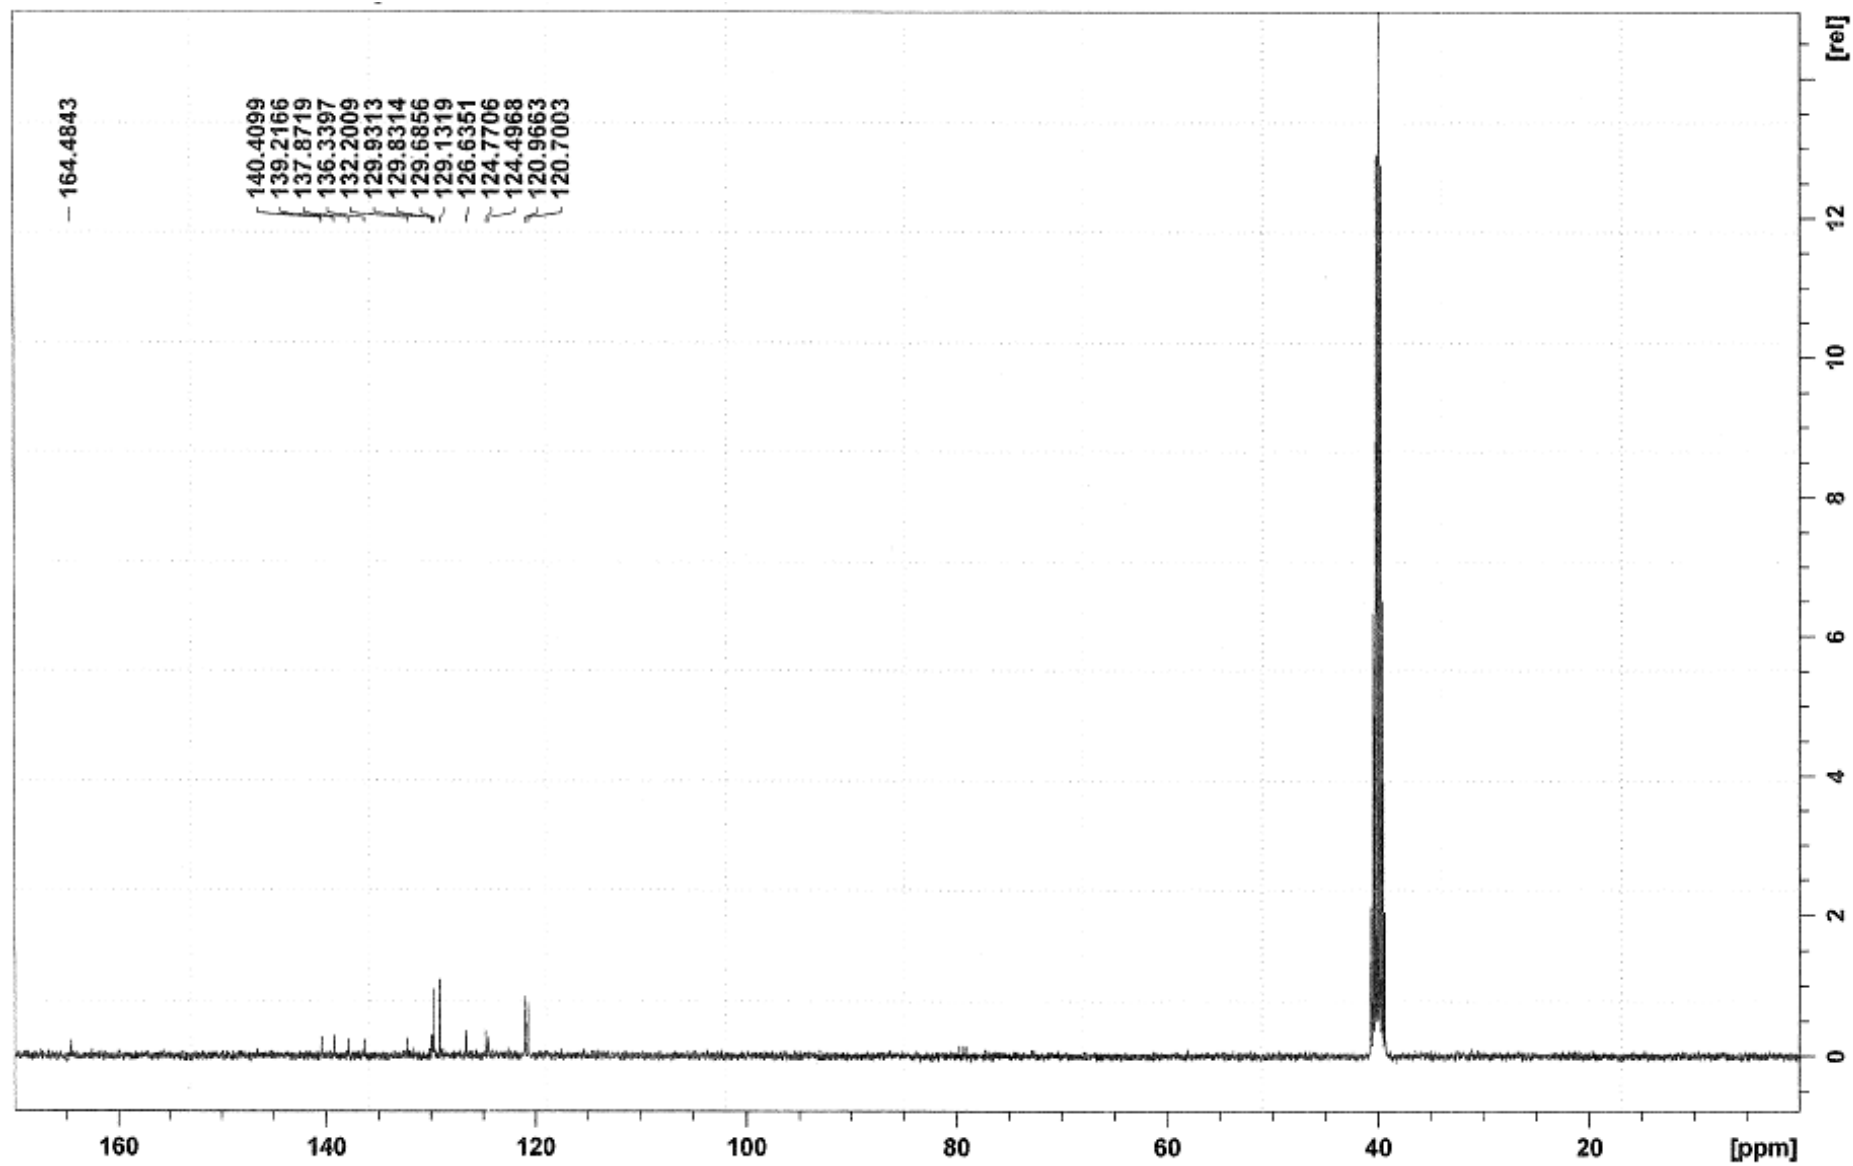

Compound **3ae**

$^1\text{H}$ -NMR

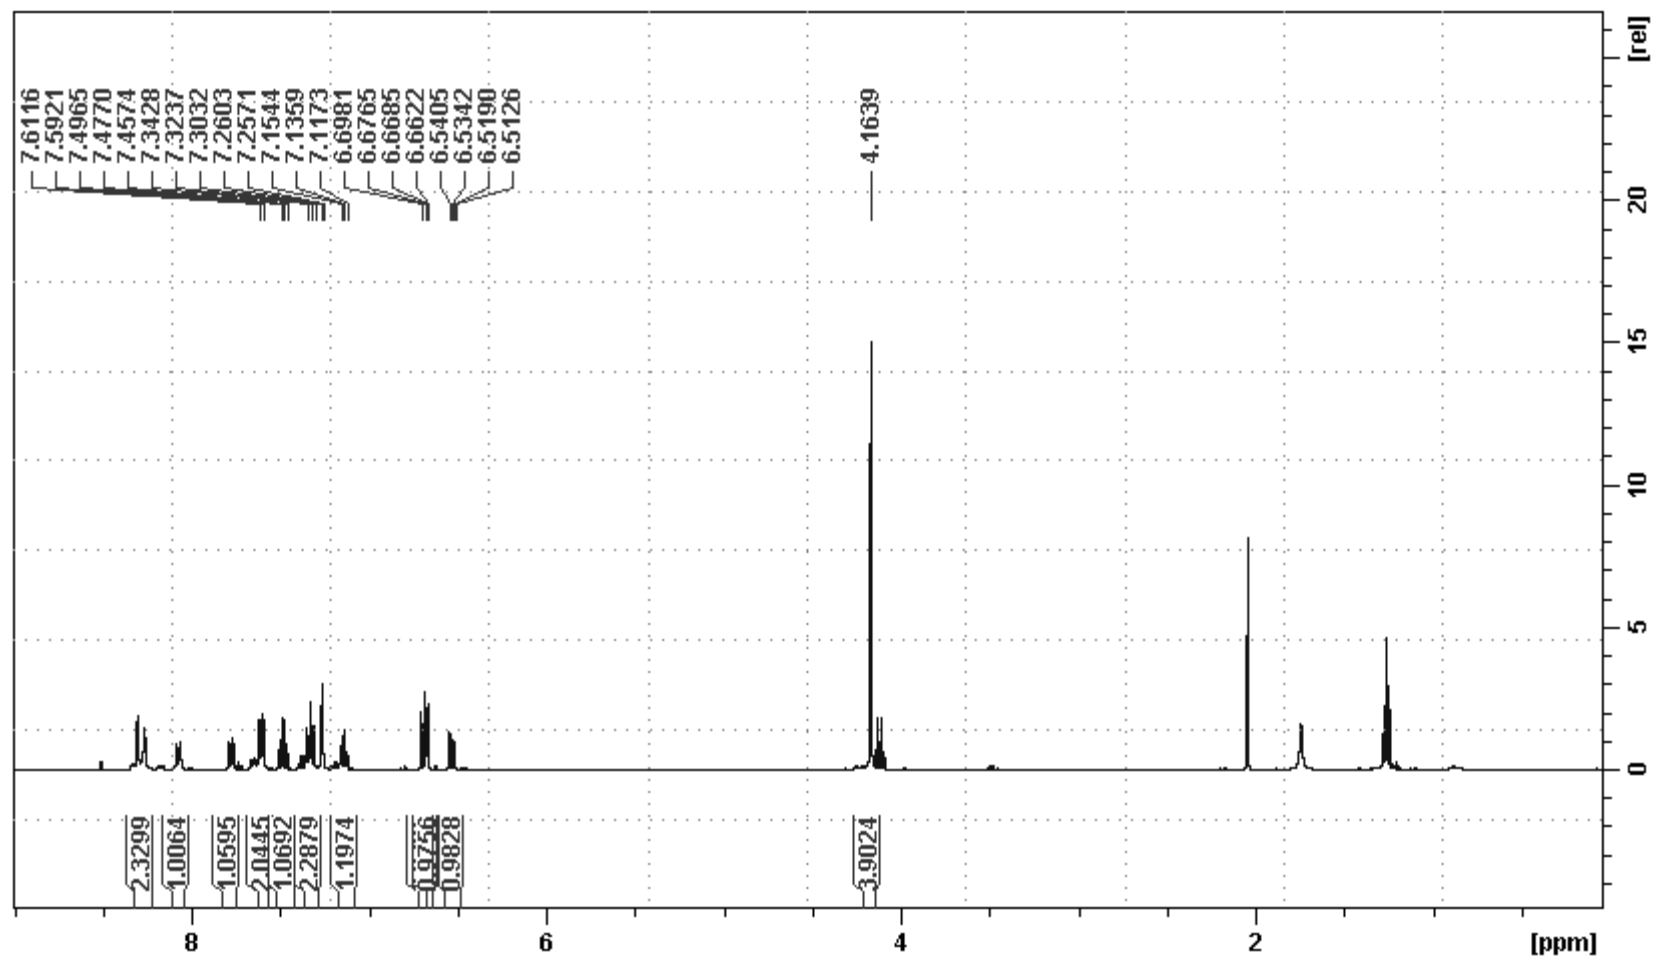

<sup>13</sup>C-NMR

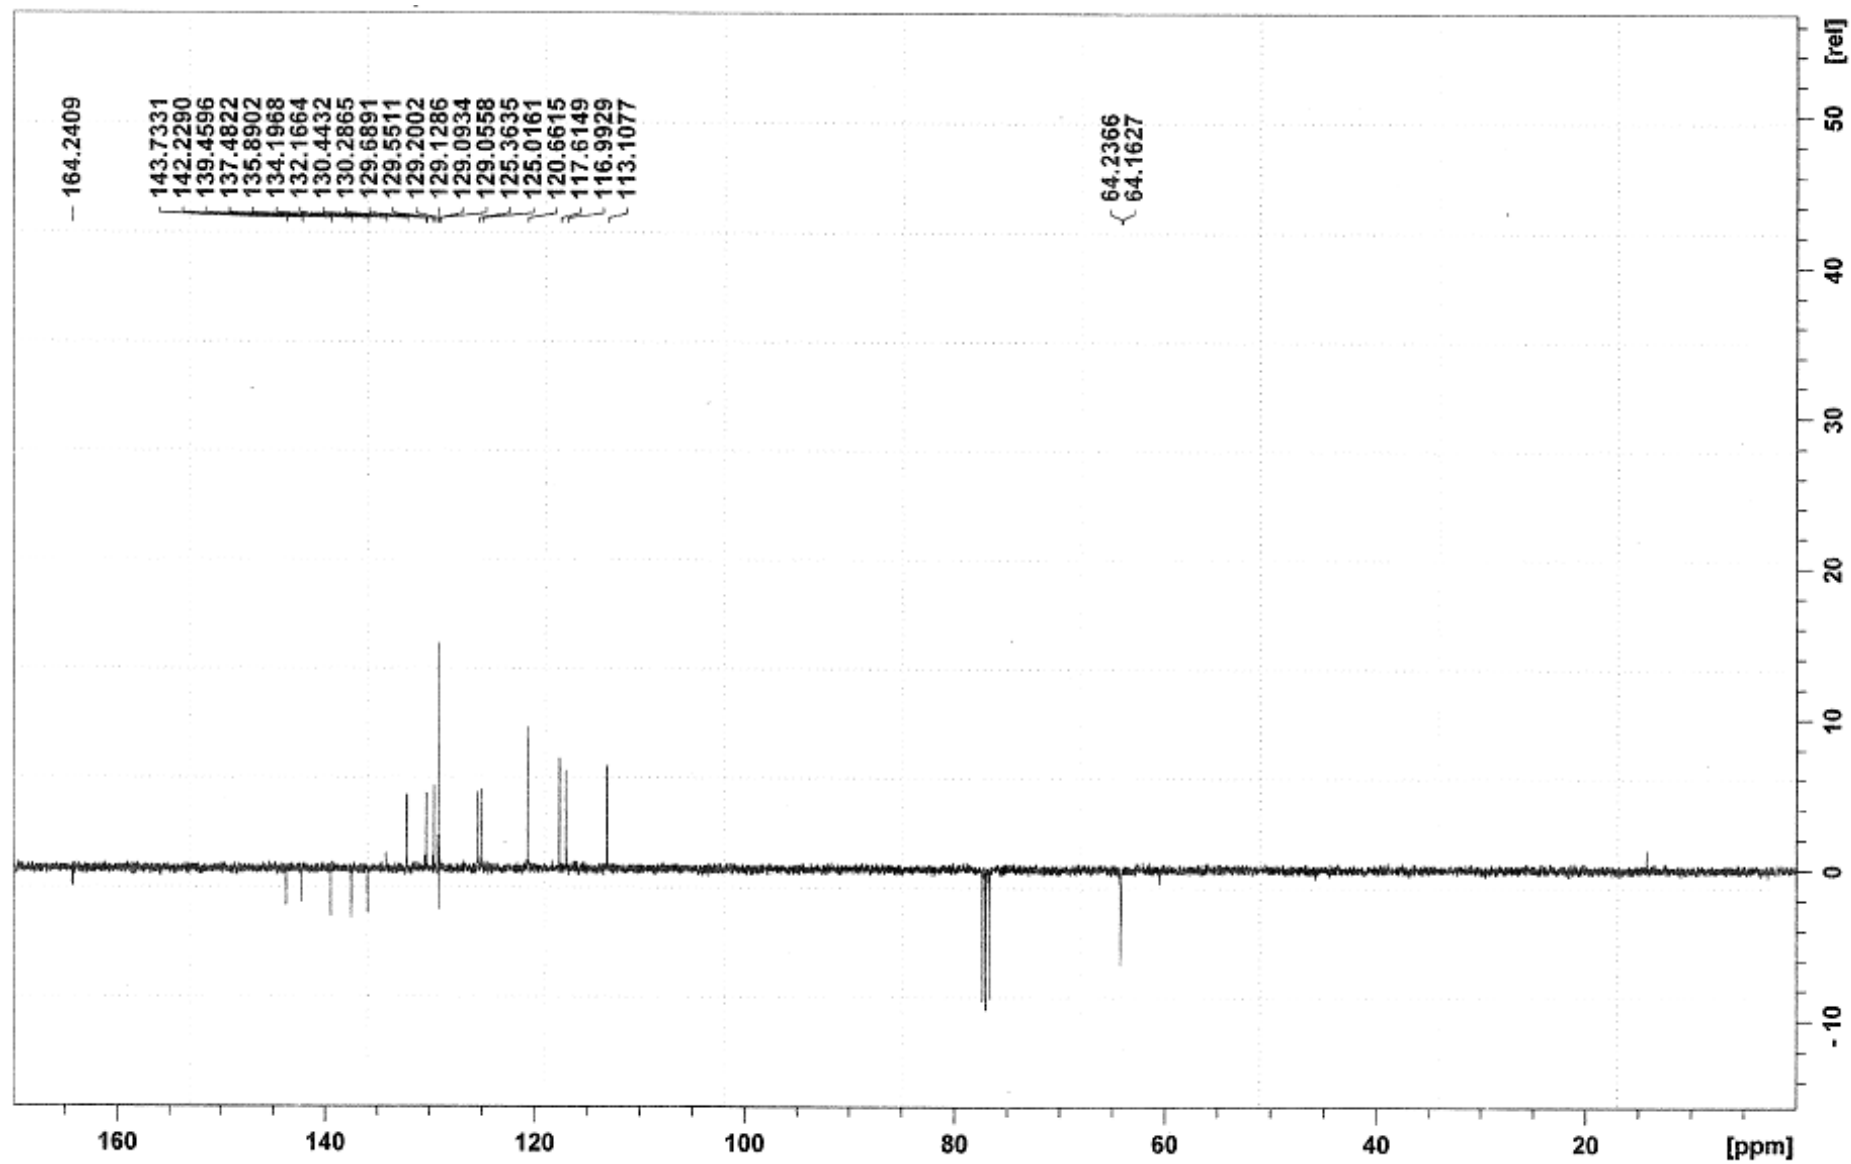

Compound **3ag**

$^1\text{H}$ -NMR

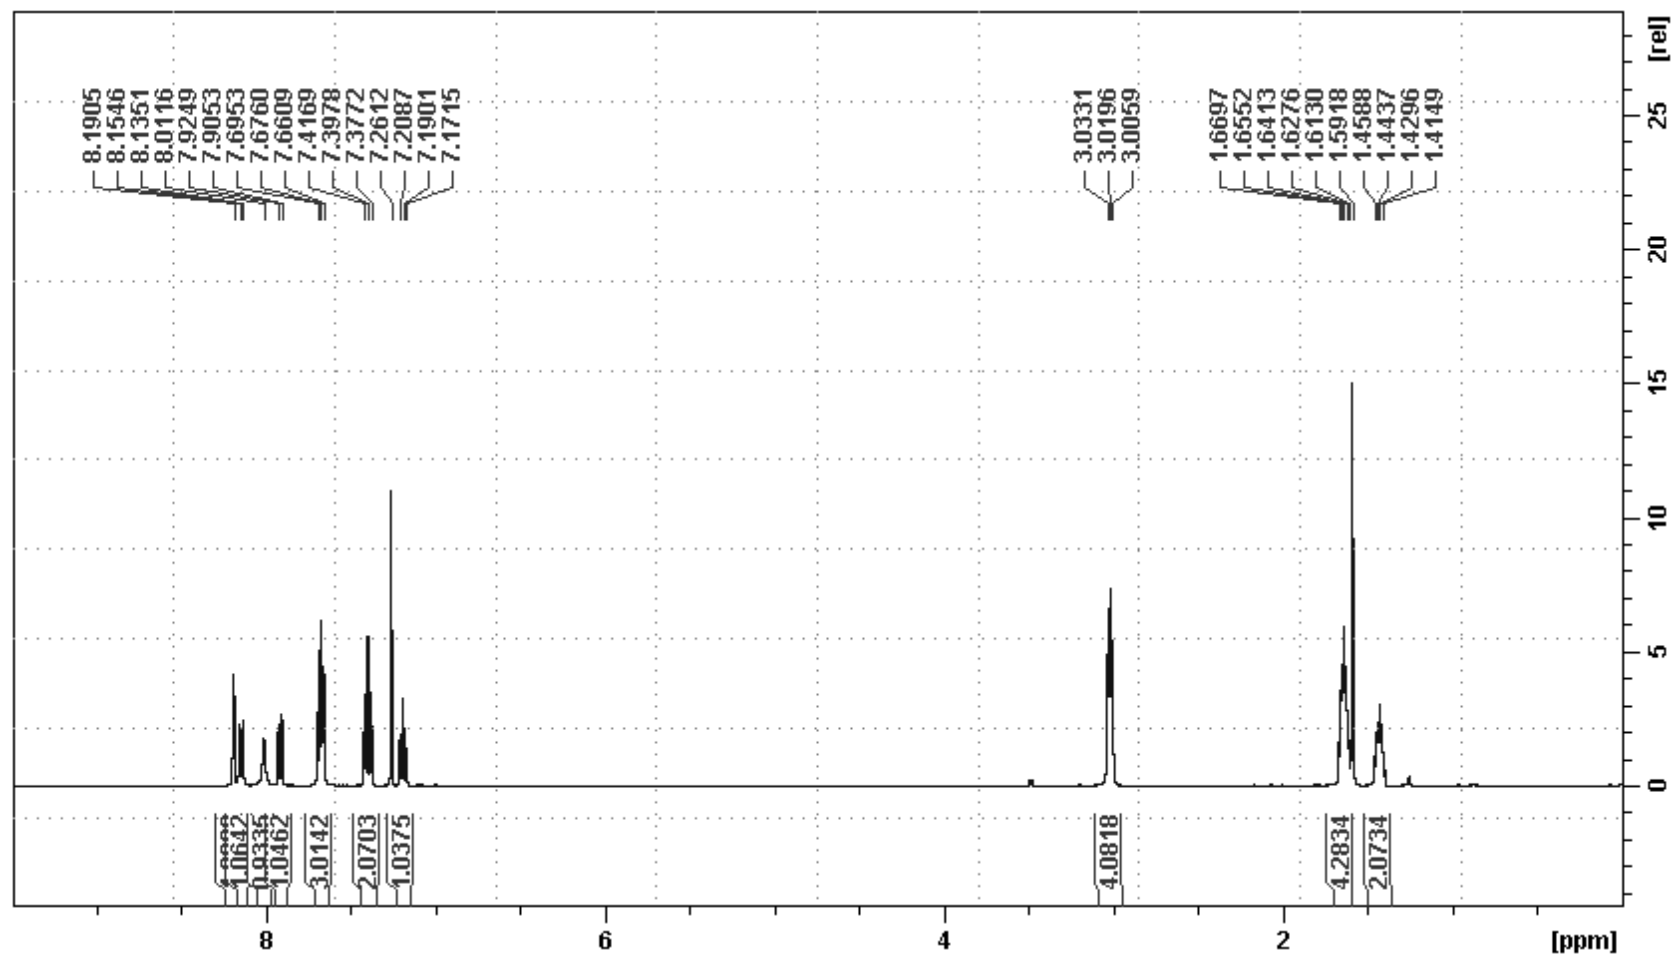

$^{13}\text{C}$ -NMR

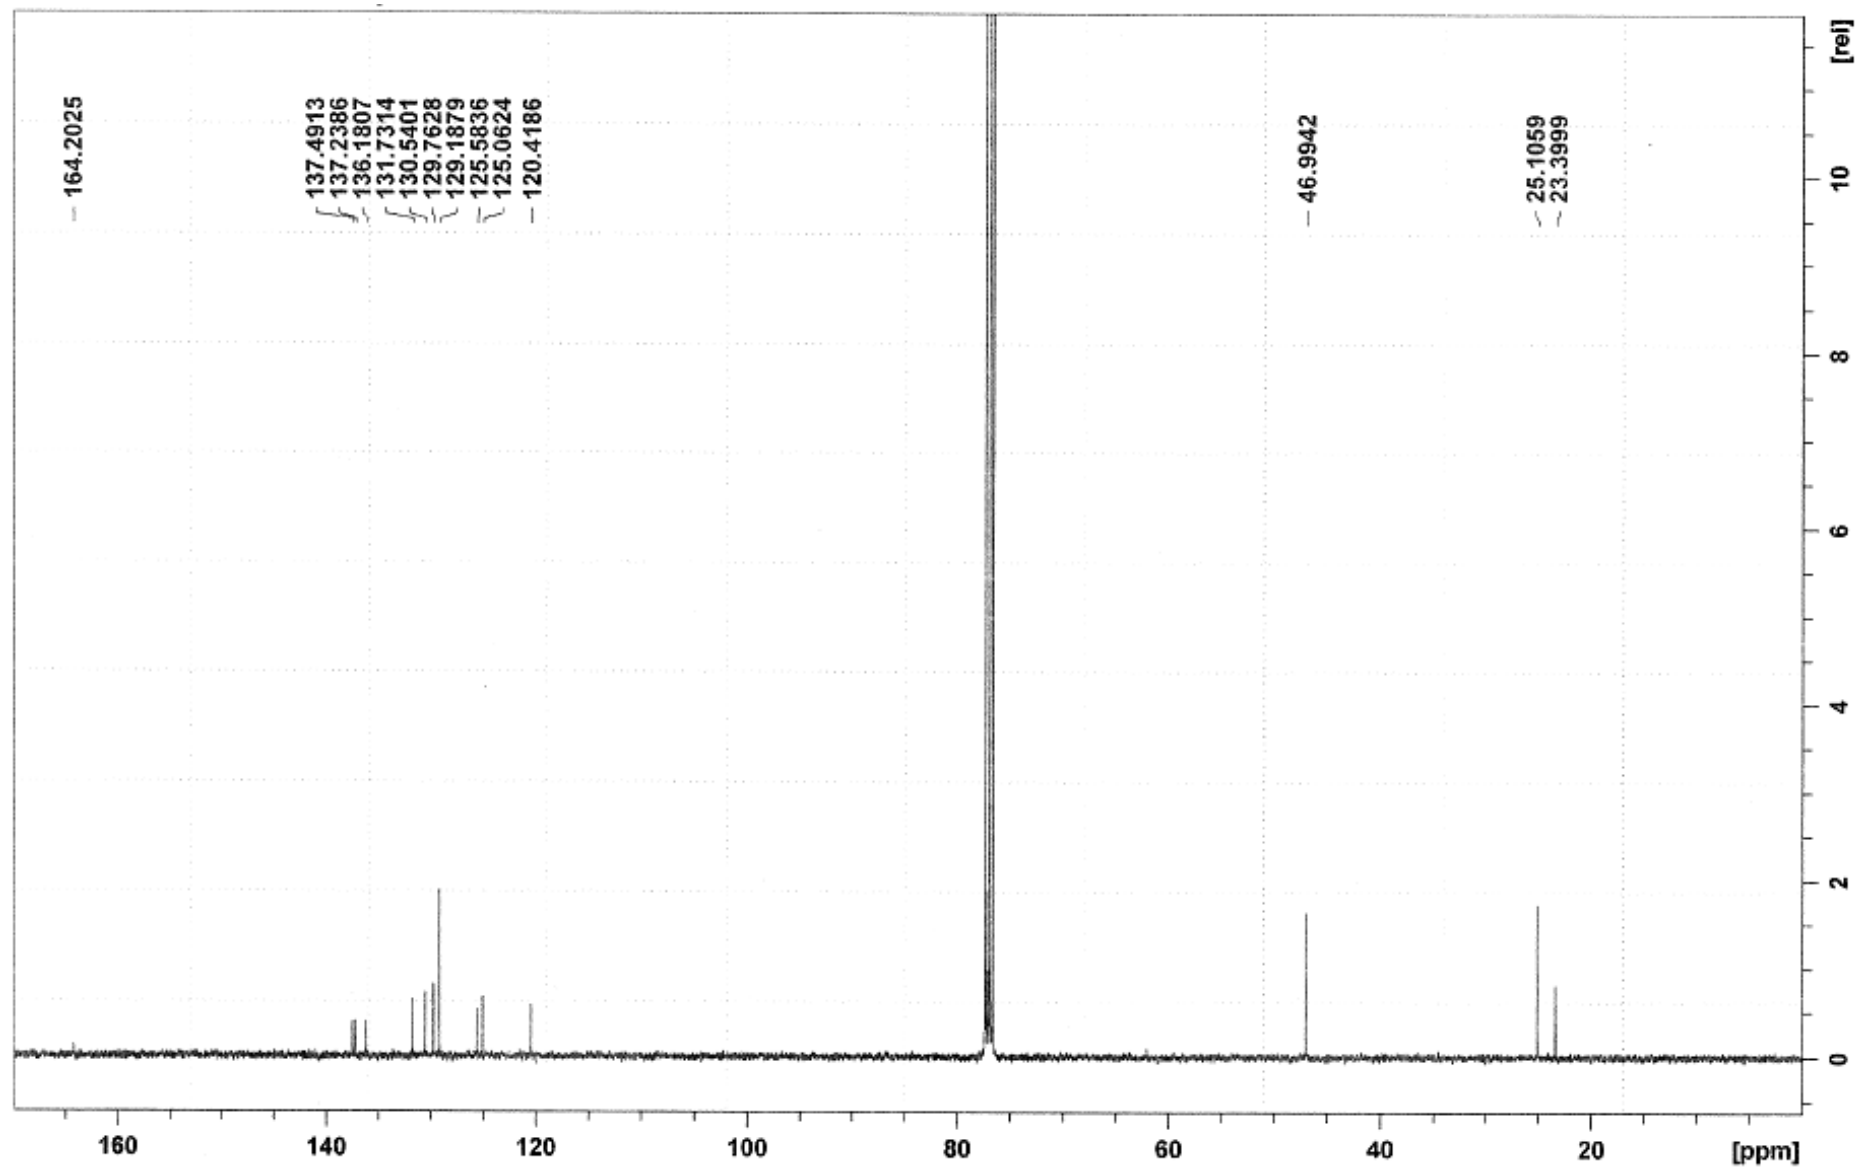

Compound **3ca**

$^1\text{H}$ -NMR

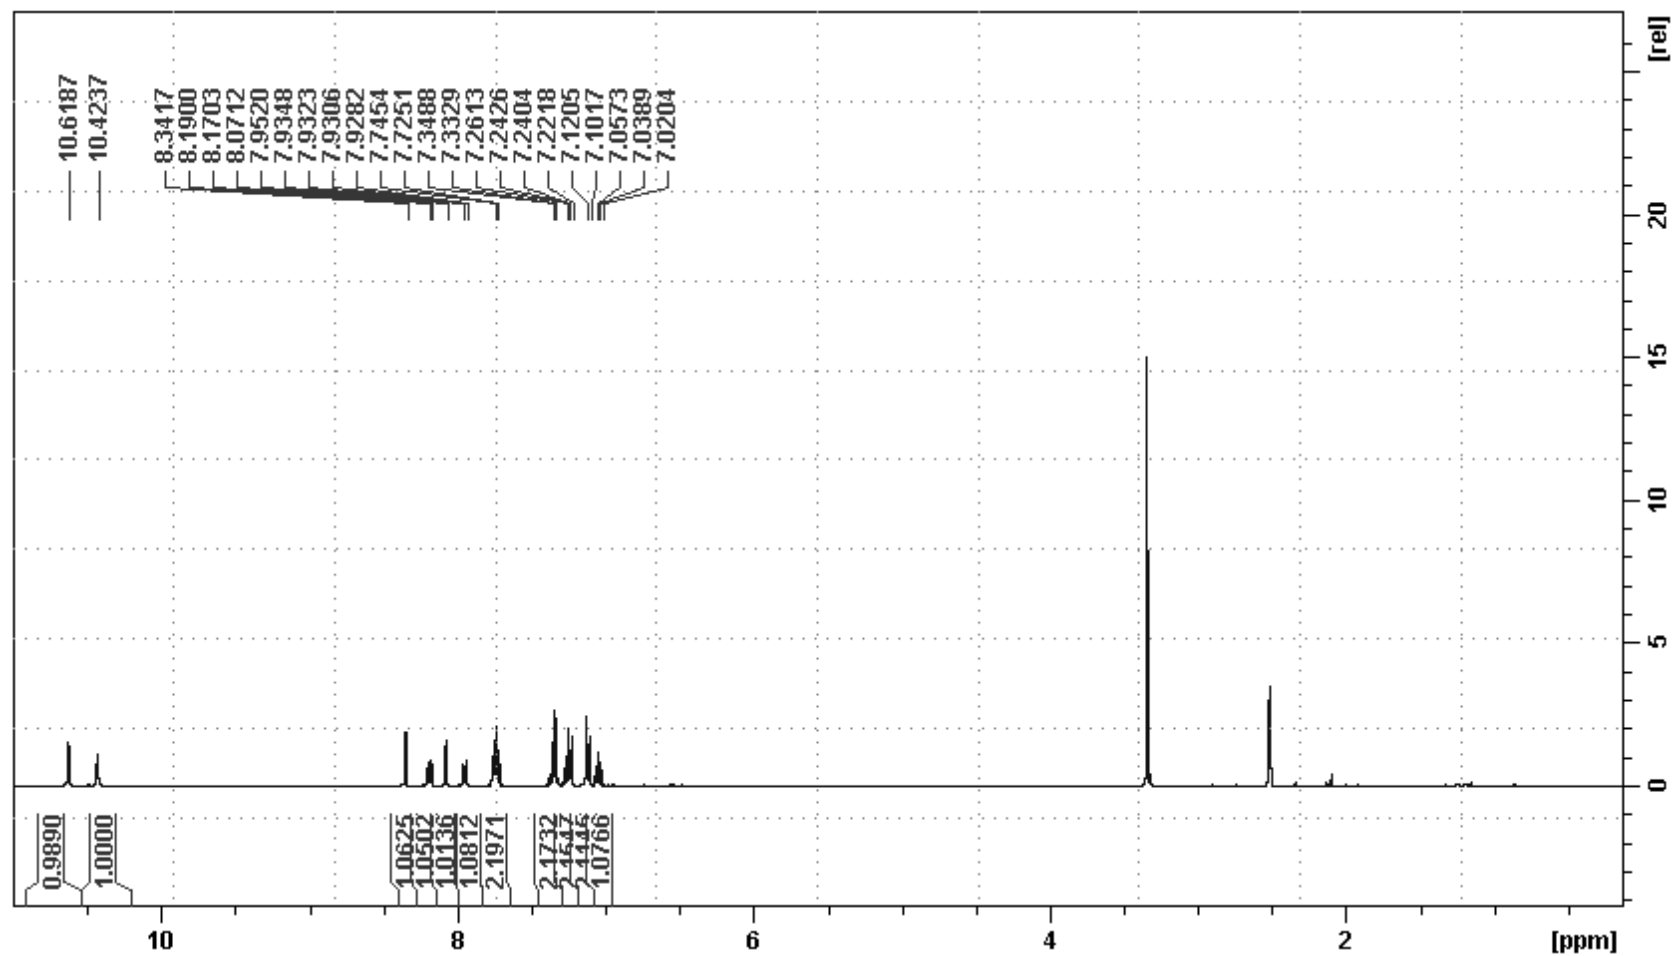

$^{13}\text{C}$ -NMR

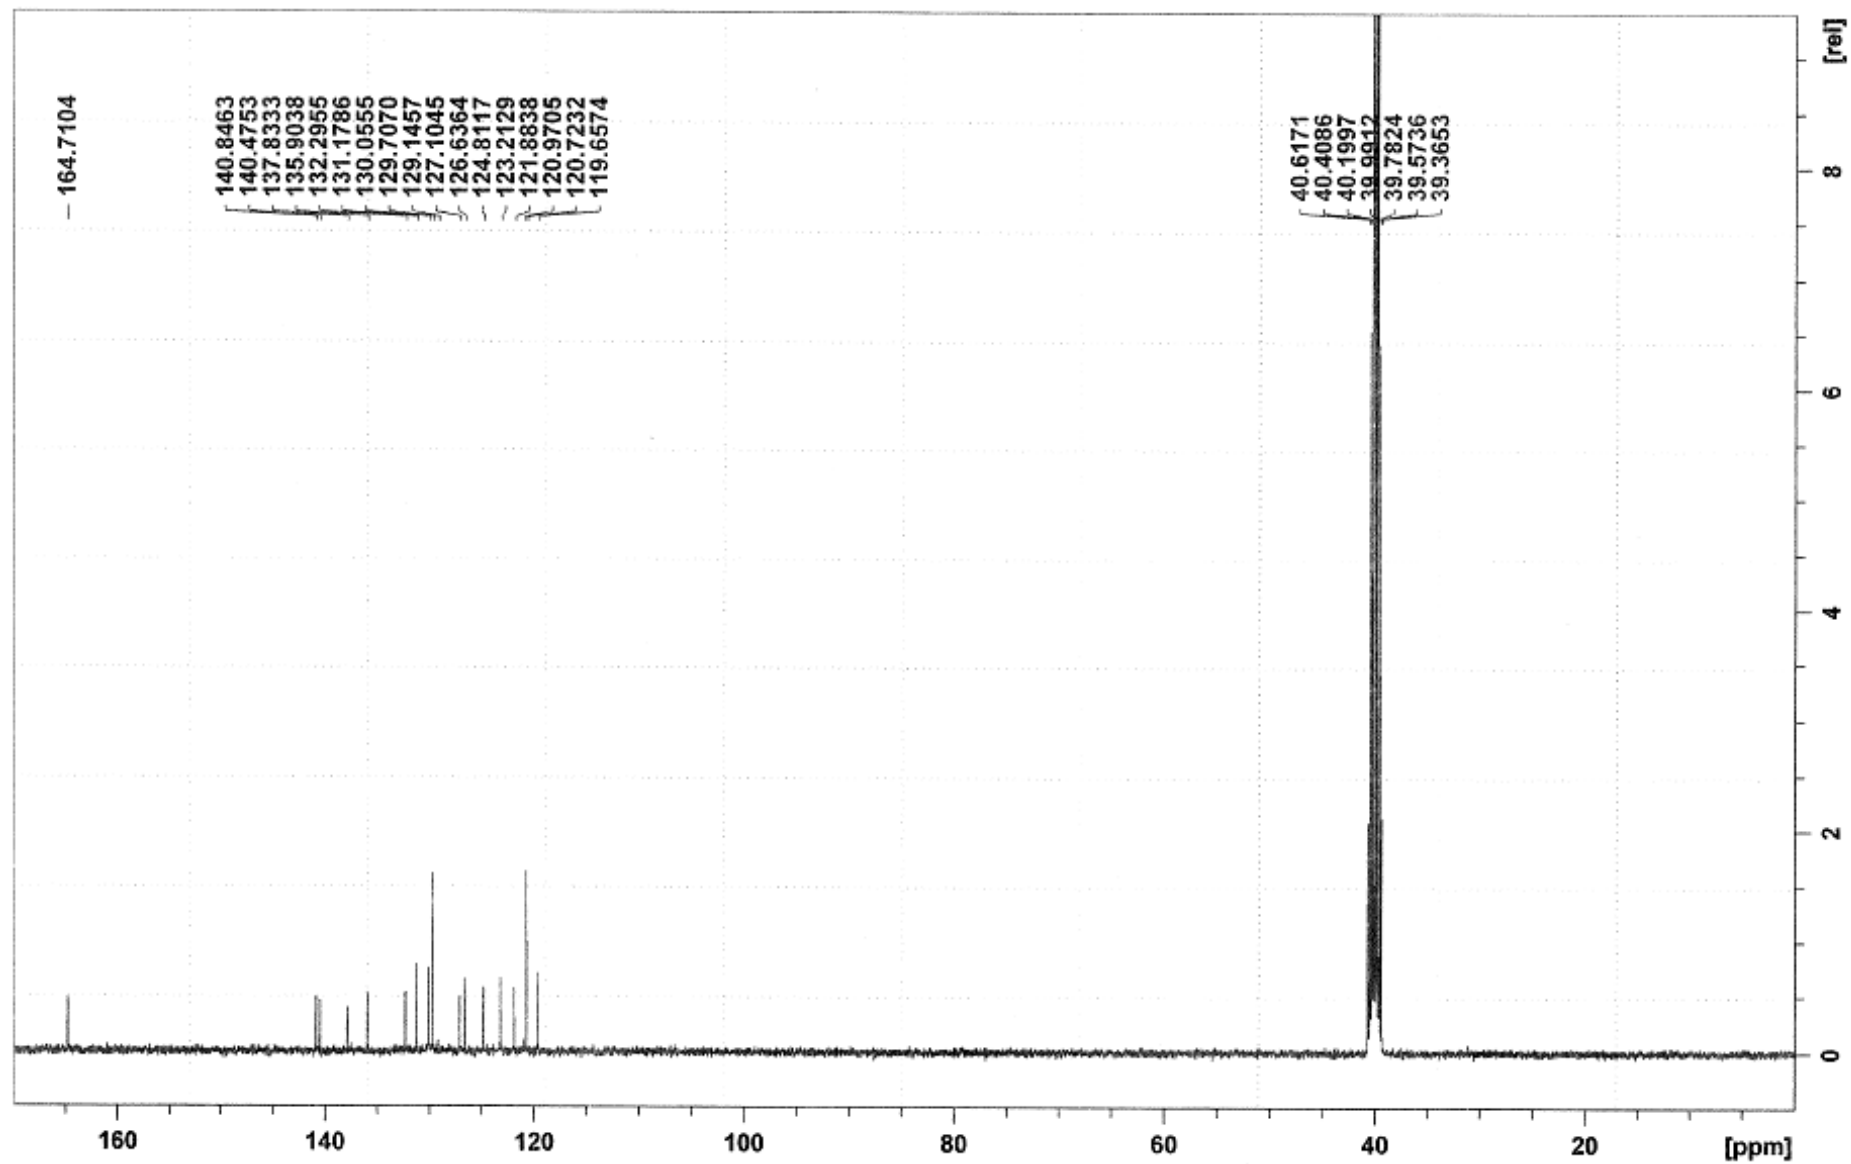



Compound **3cb**

$^1\text{H}$ -NMR

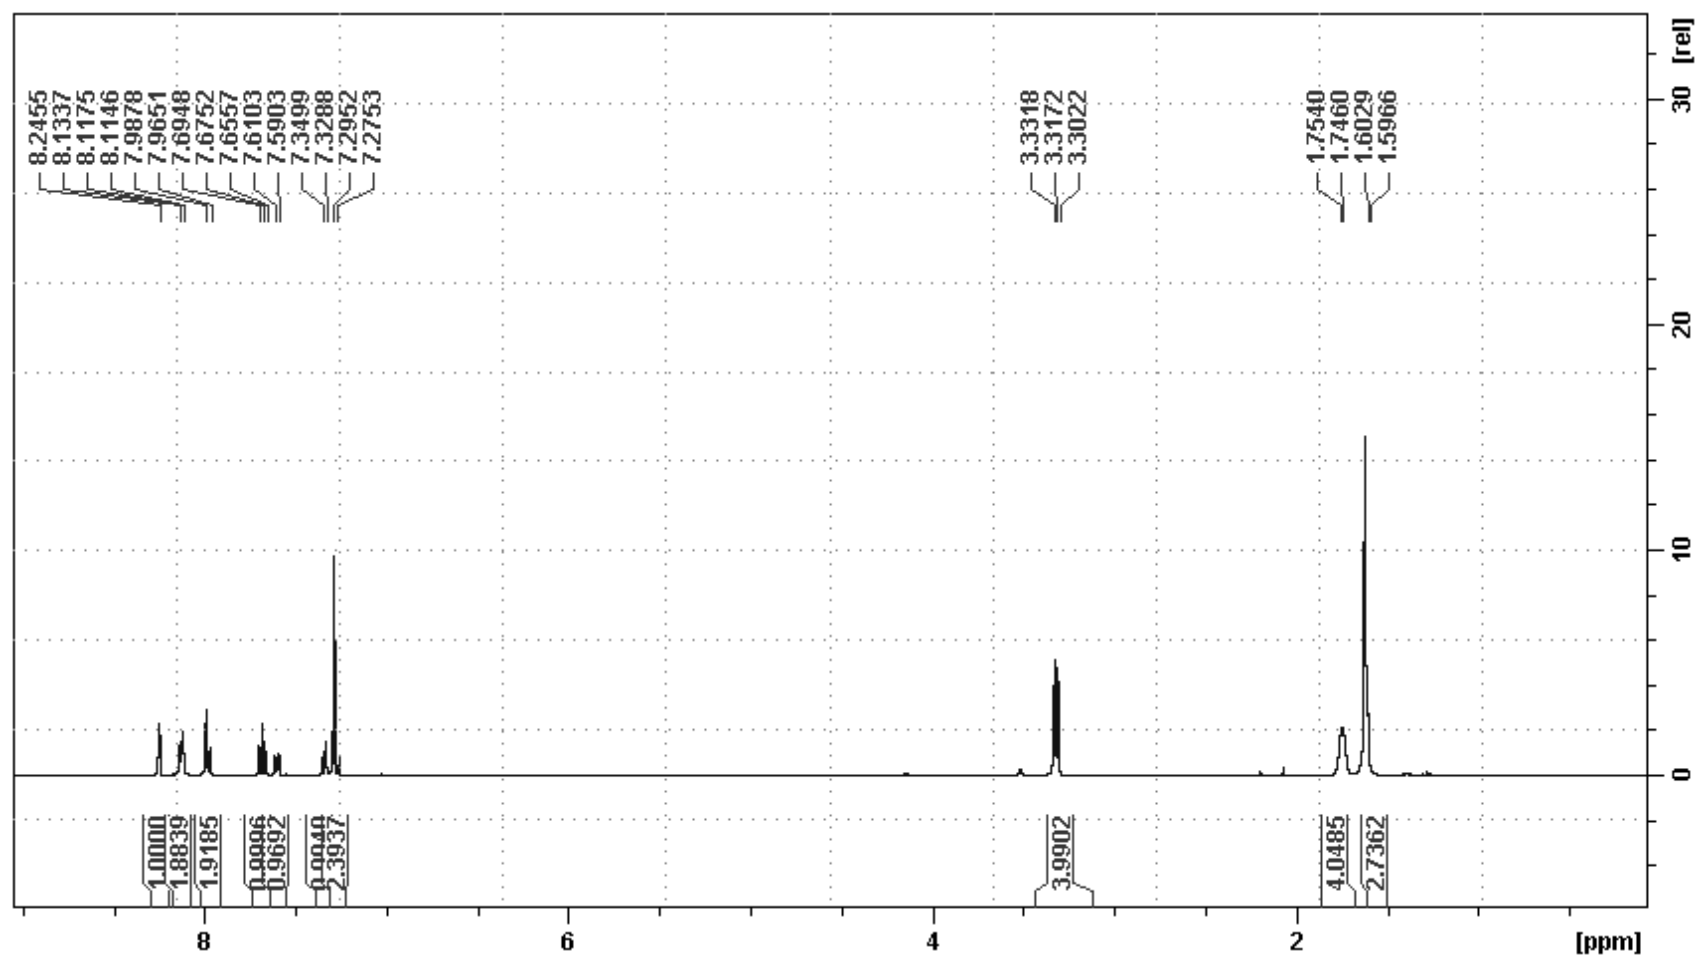

<sup>13</sup>C-NMR

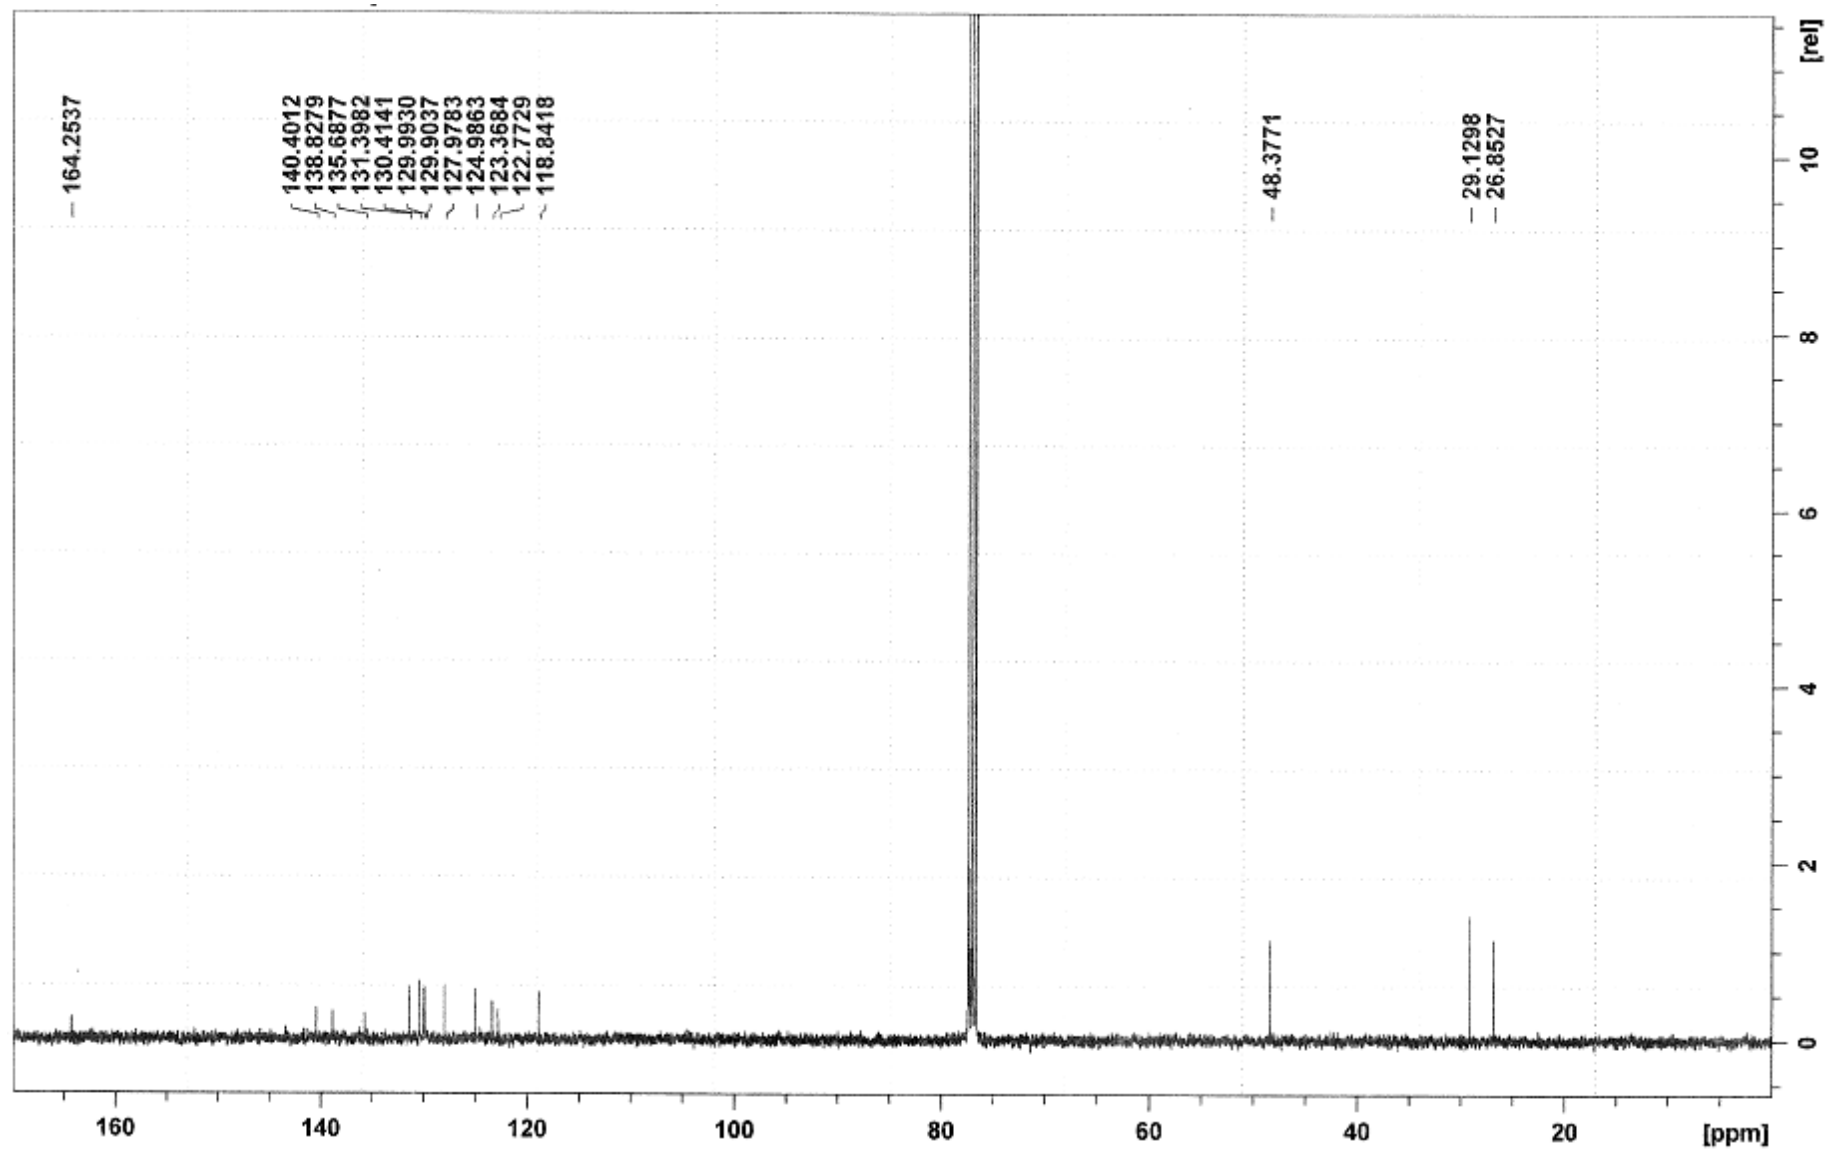

Compound **3cc**

$^1\text{H}$ -NMR

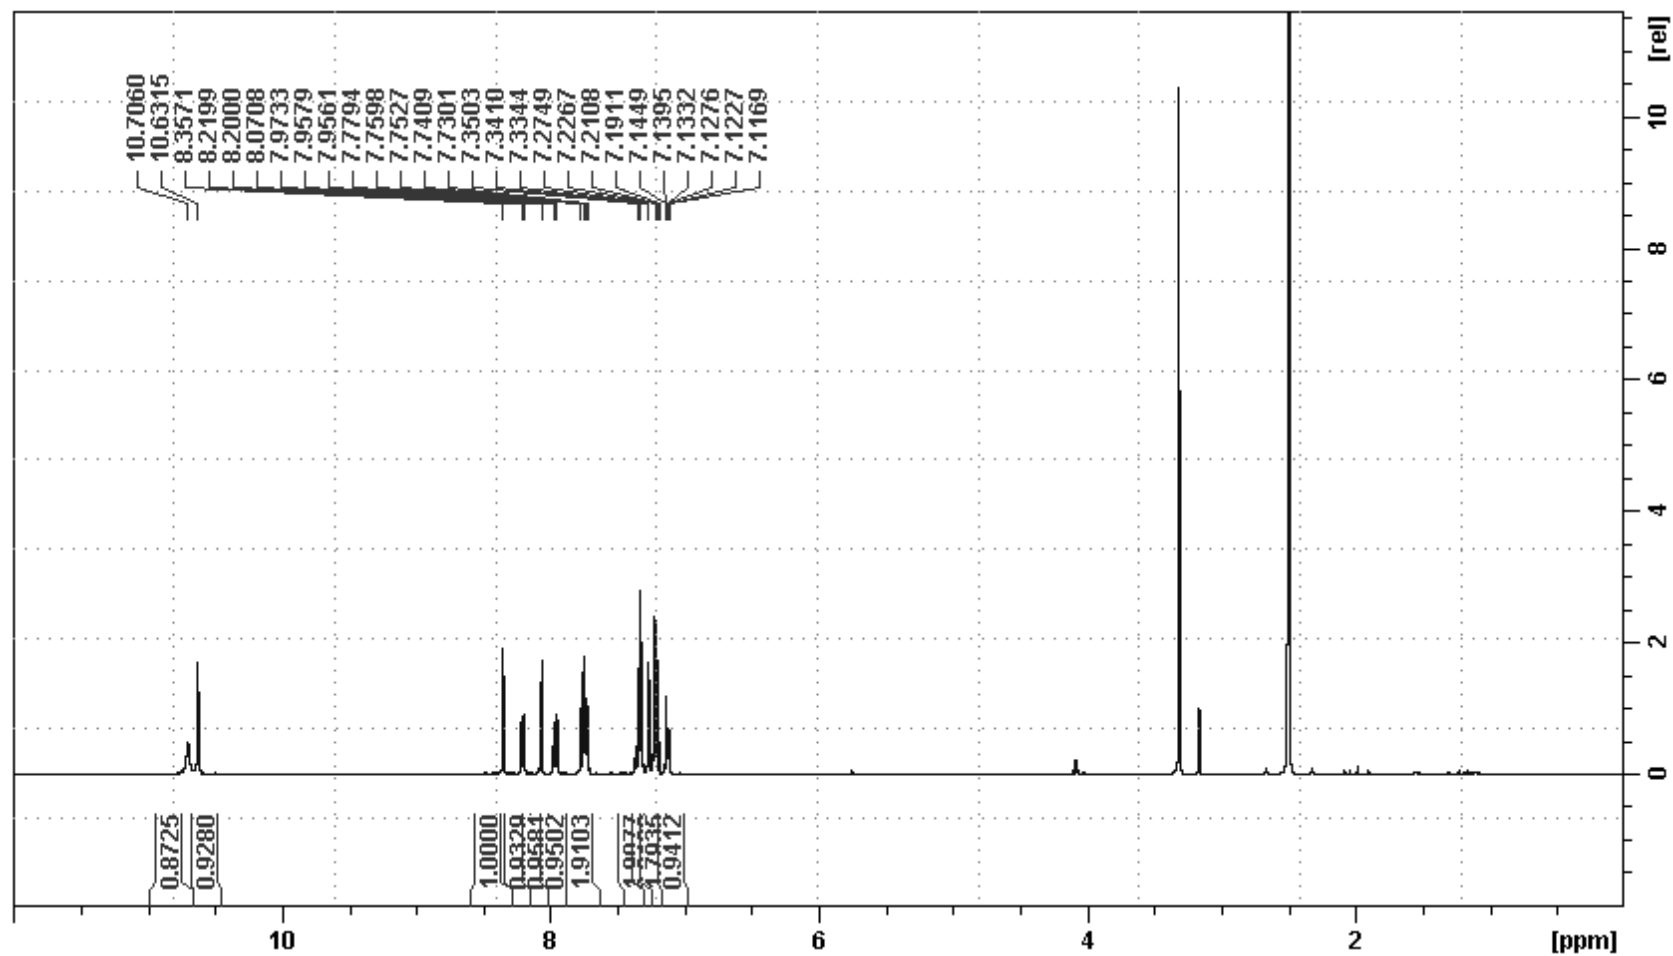

$^{13}\text{C}$ -NMR

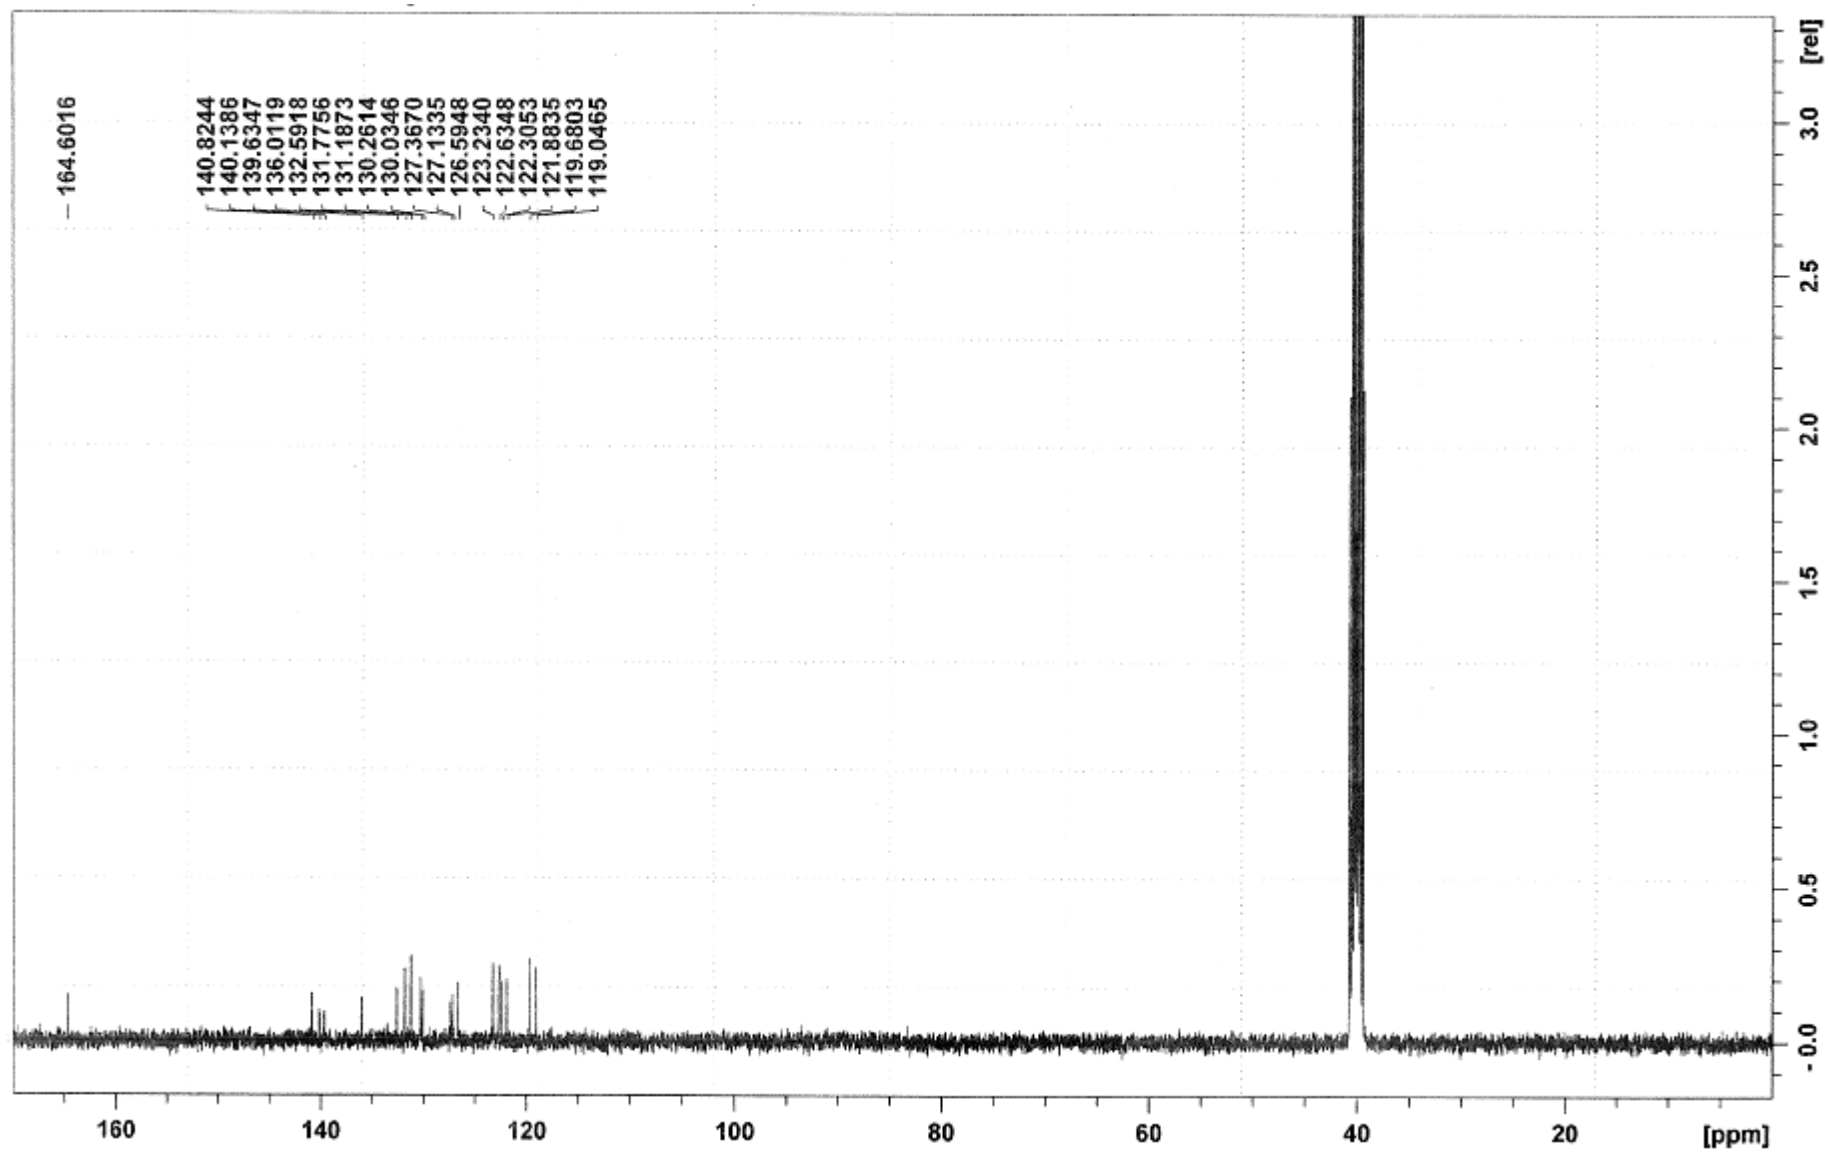

Compound **3ce**

<sup>1</sup>H-NMR

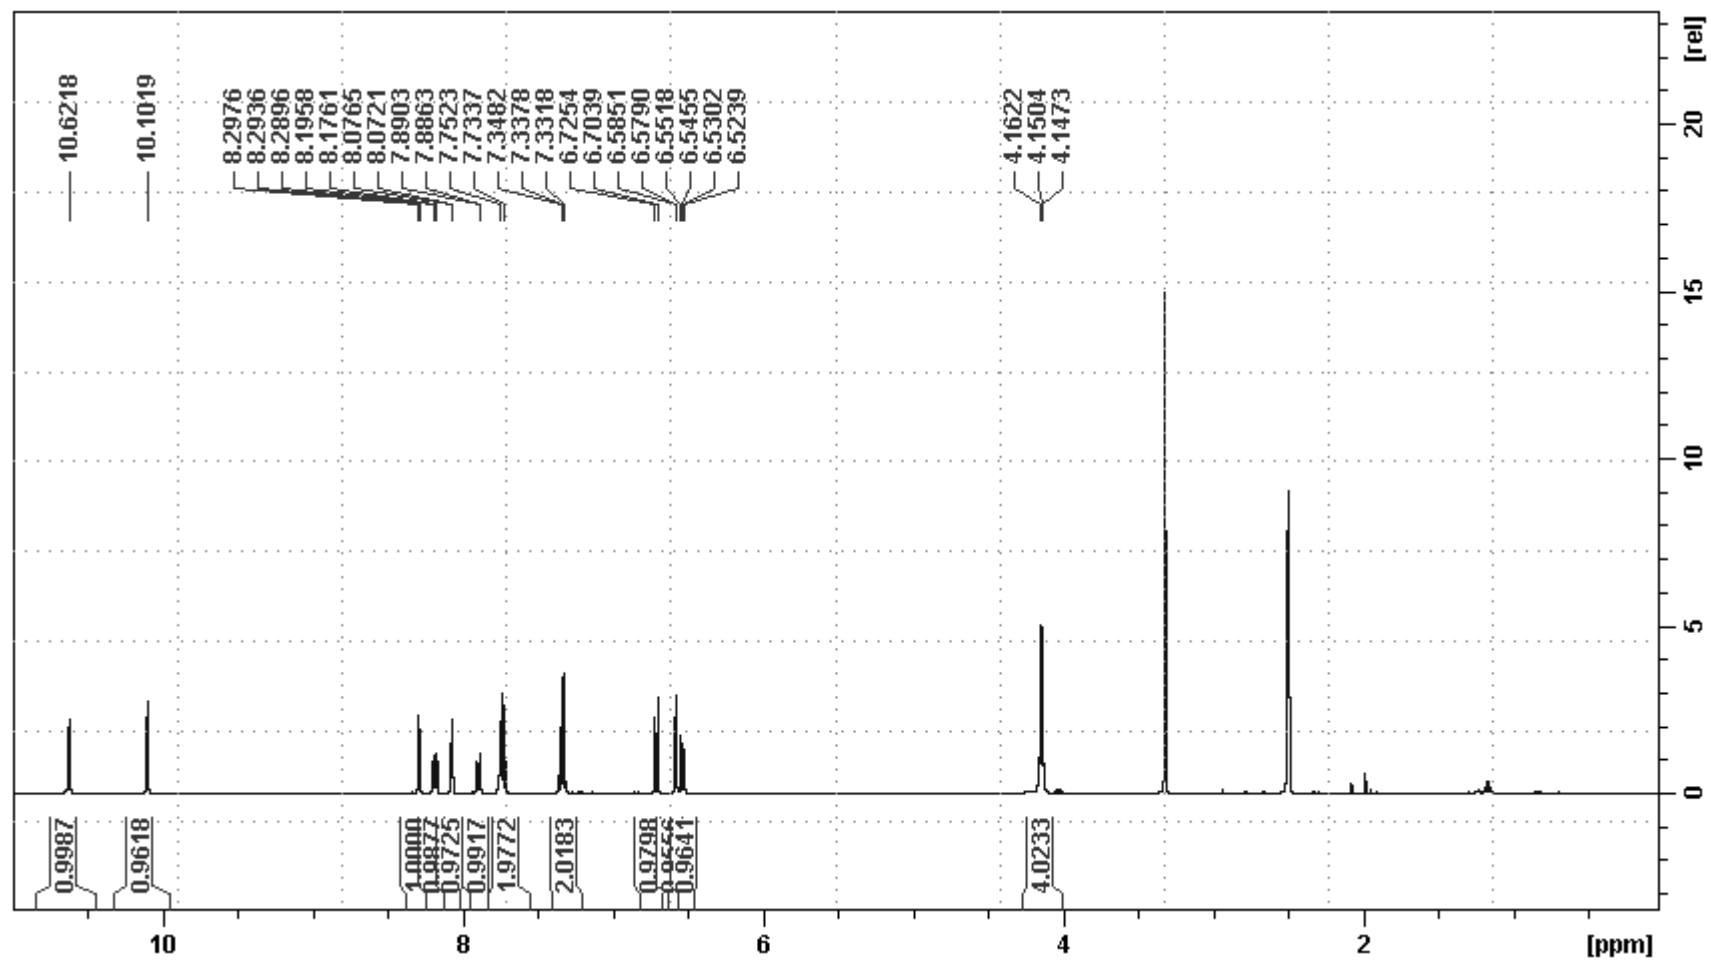

$^{13}\text{C}$ -NMR

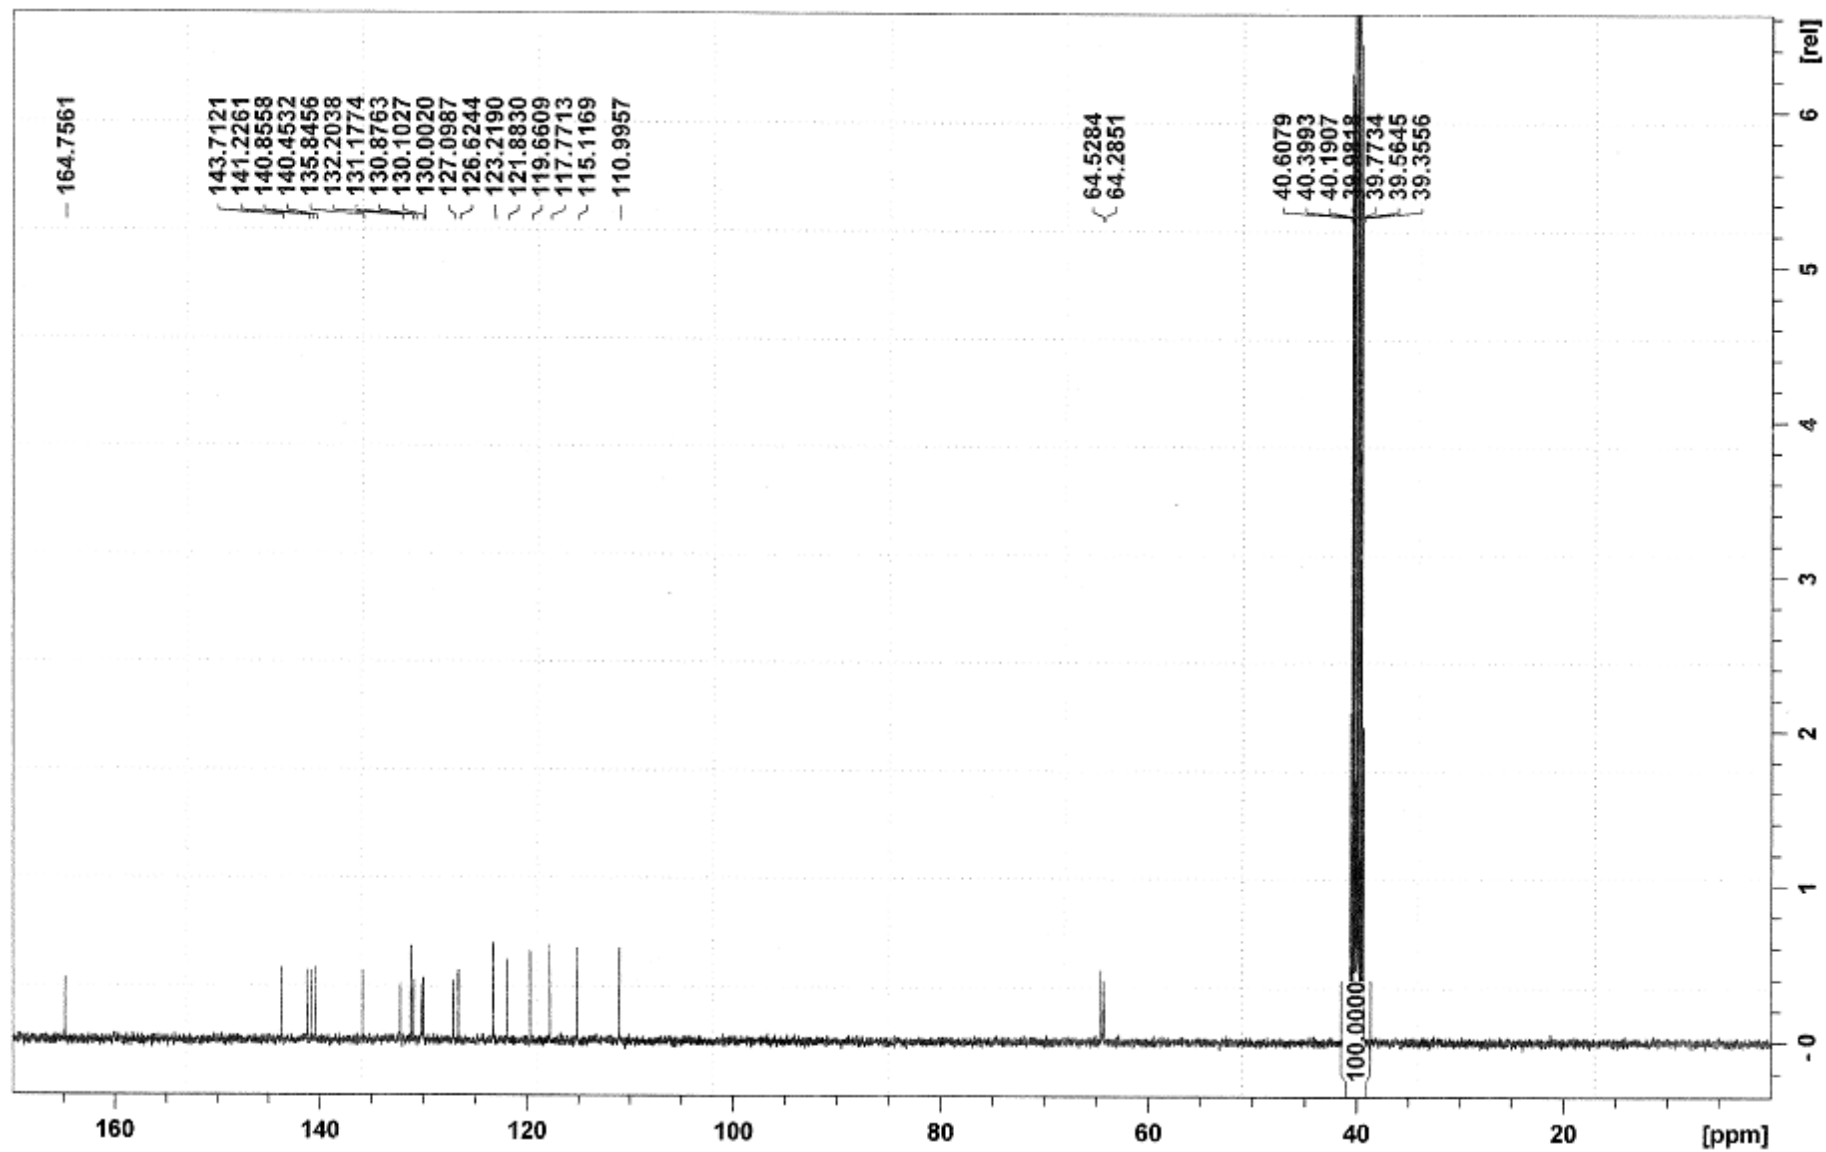

Compound **3cg**

$^1\text{H}$ -NMR

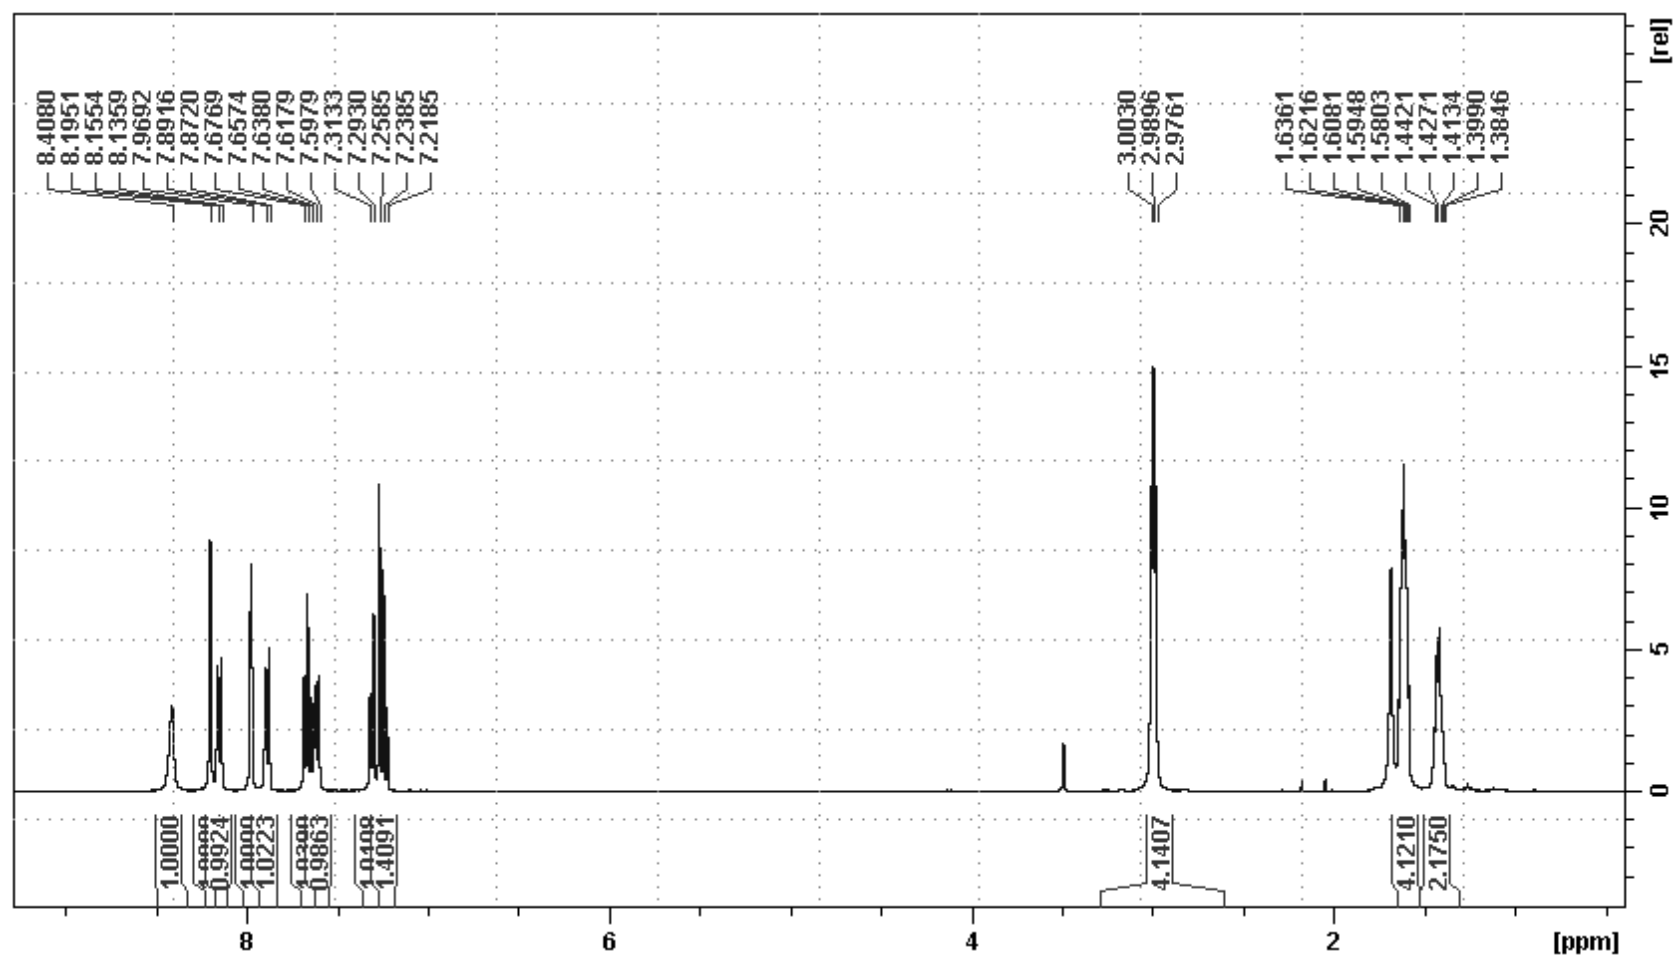

$^{13}\text{C}$ -NMR

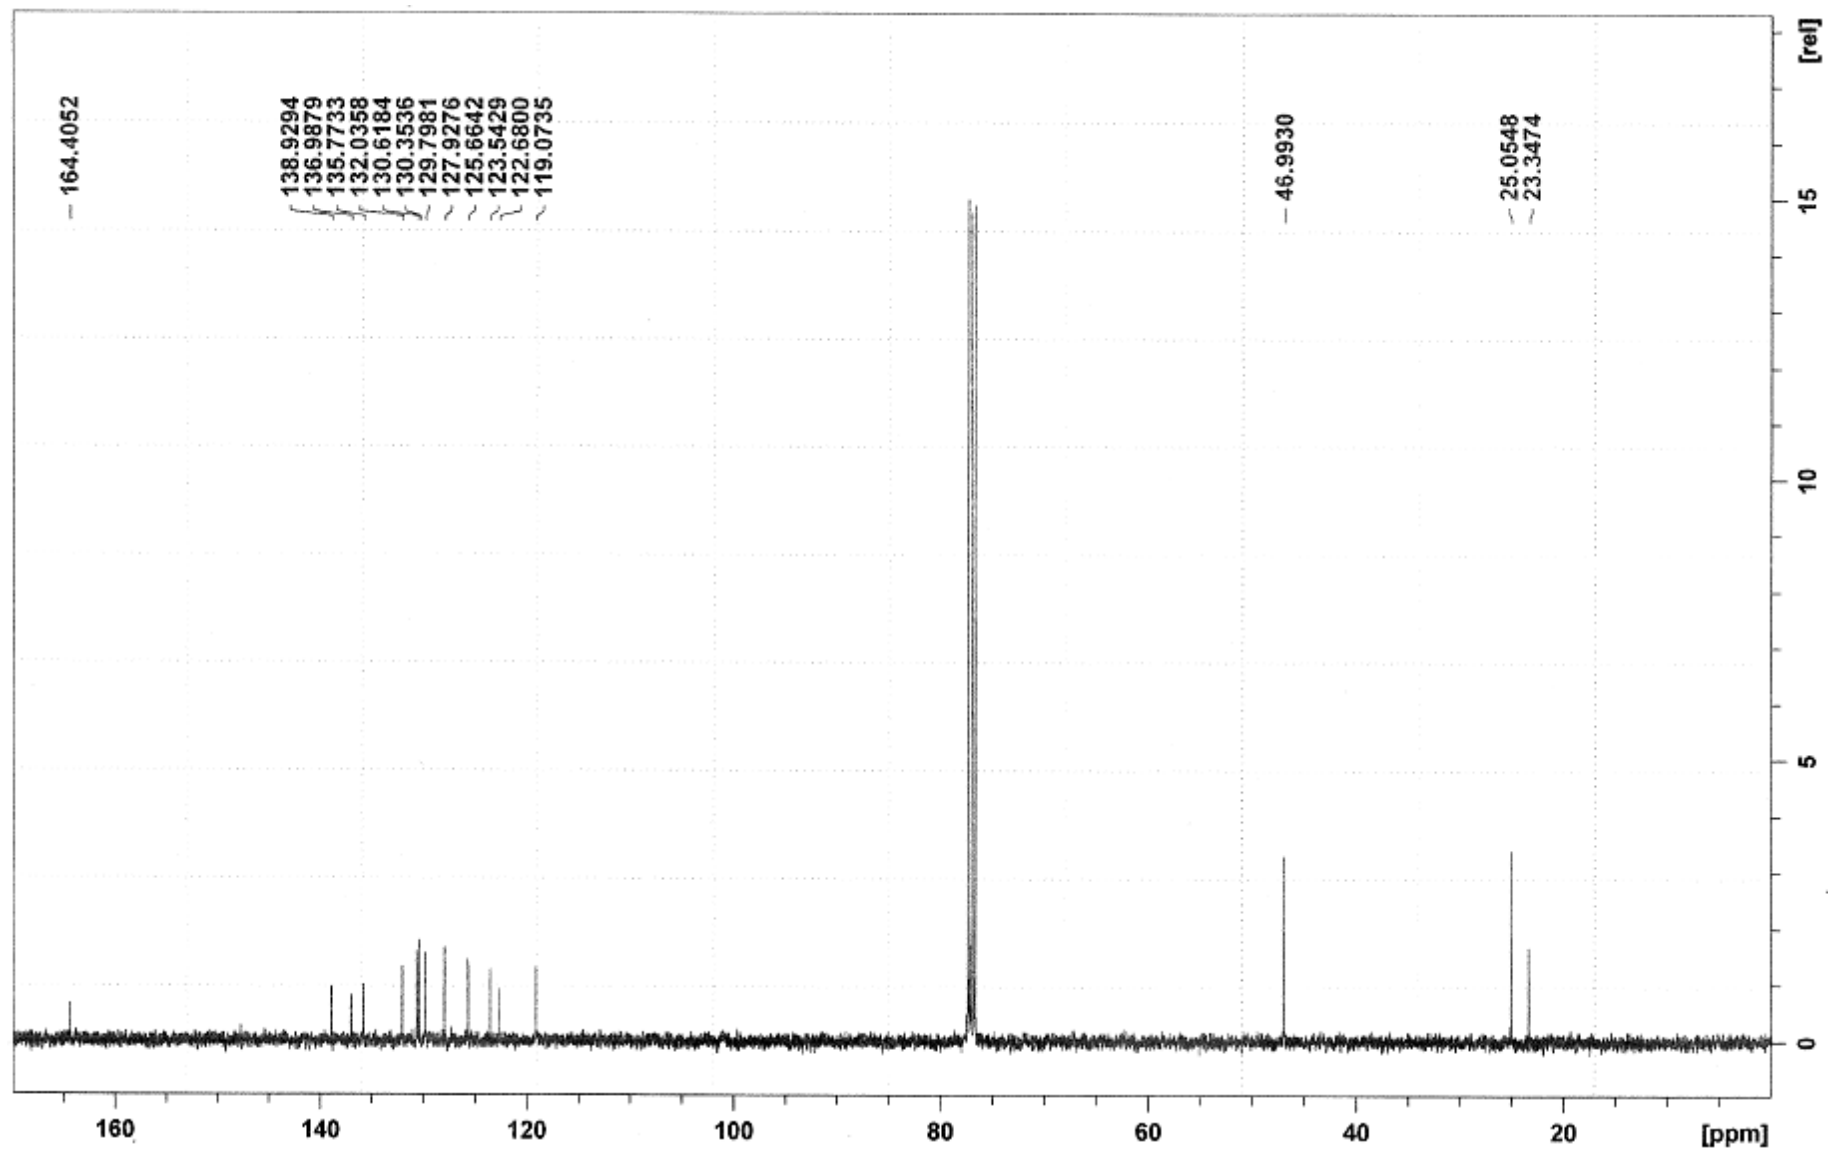



Compound **3ea**

$^1\text{H}$ -NMR

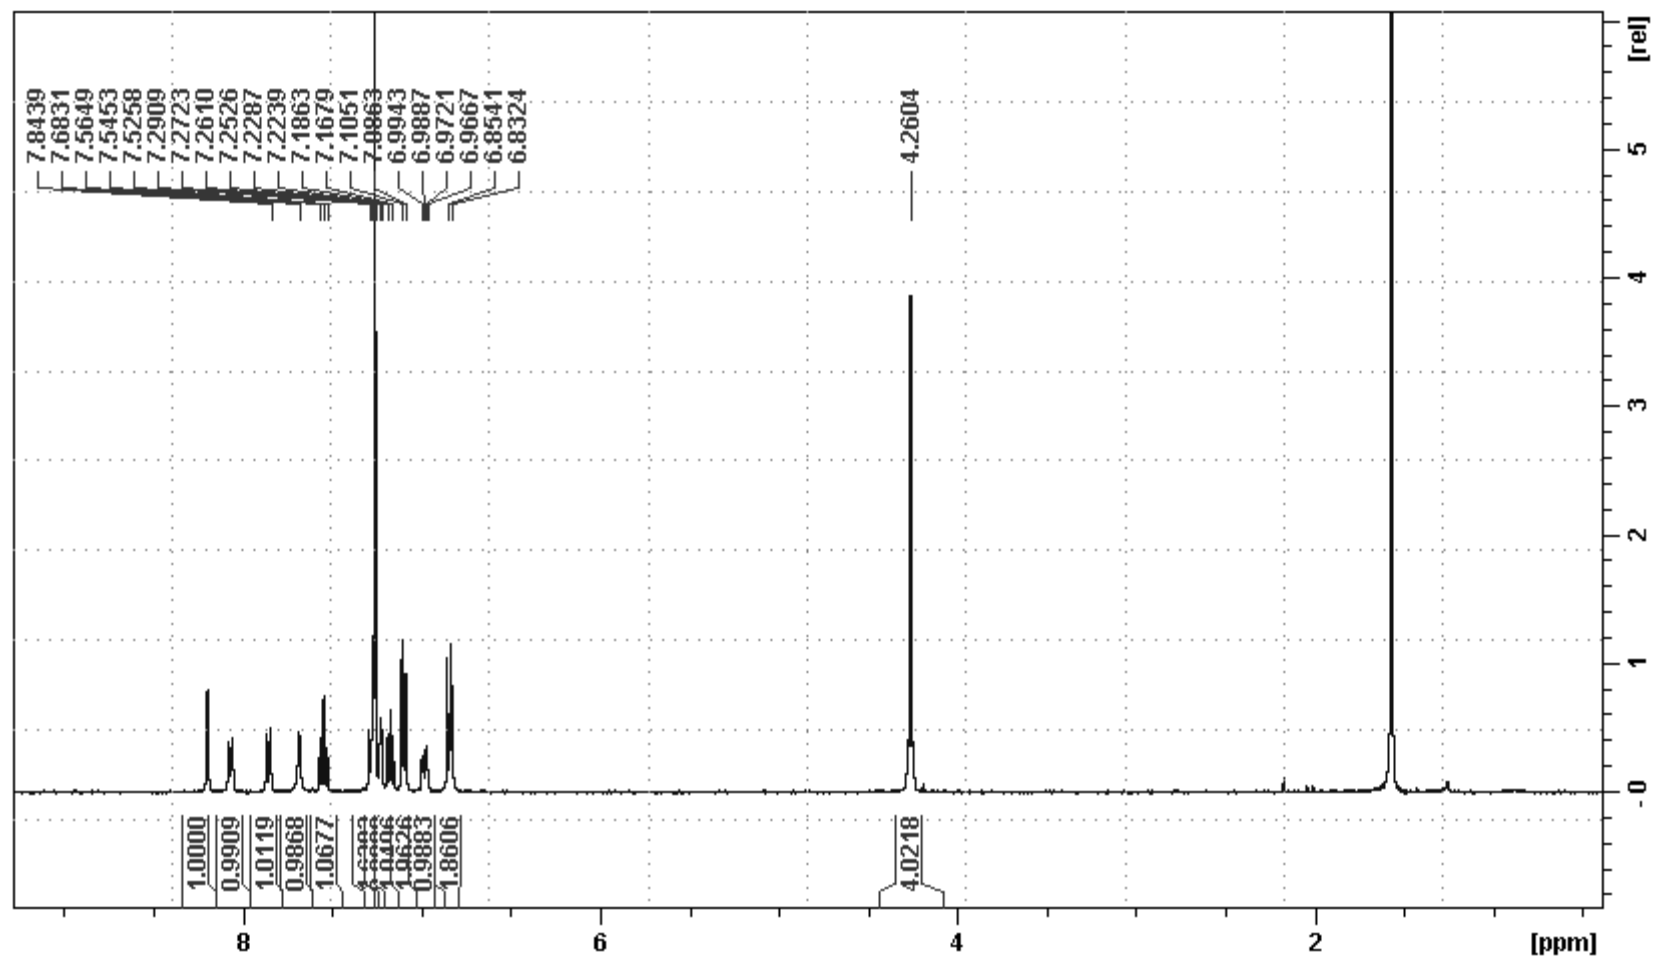

$^{13}\text{C}$ -NMR

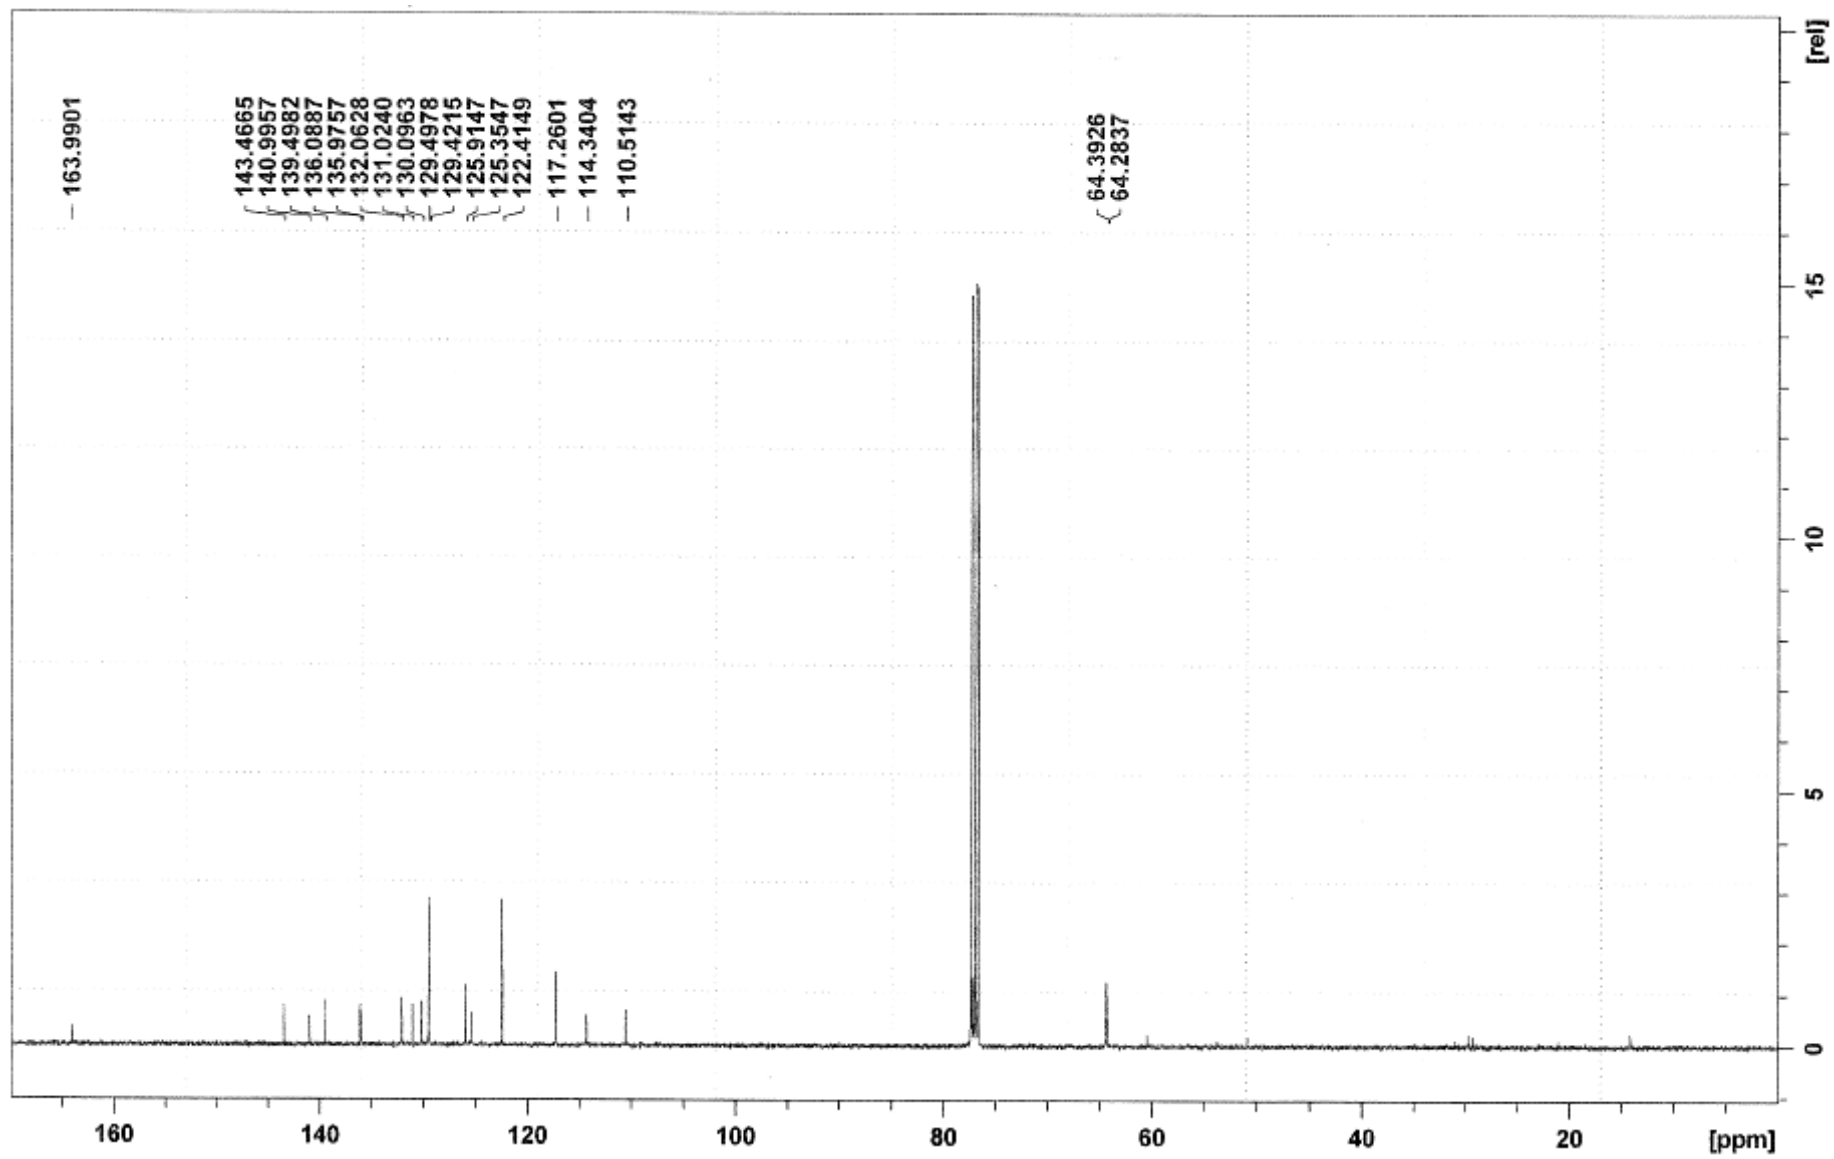

Compound **3eb**

<sup>1</sup>H-NMR

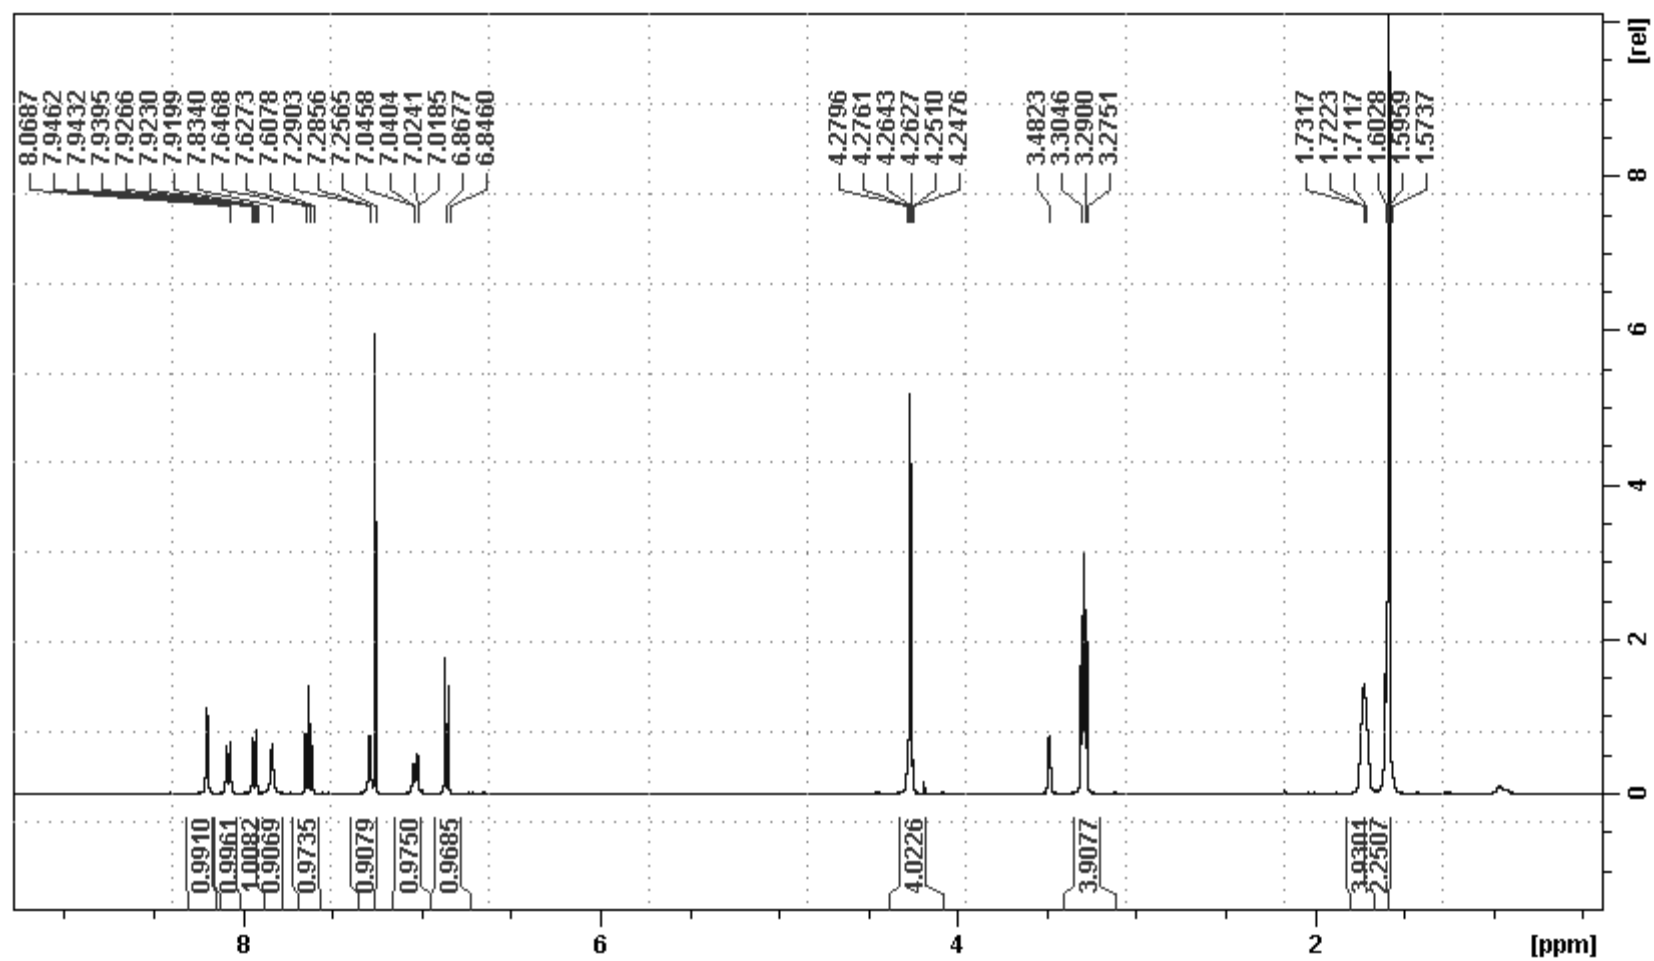

<sup>13</sup>C-NMR

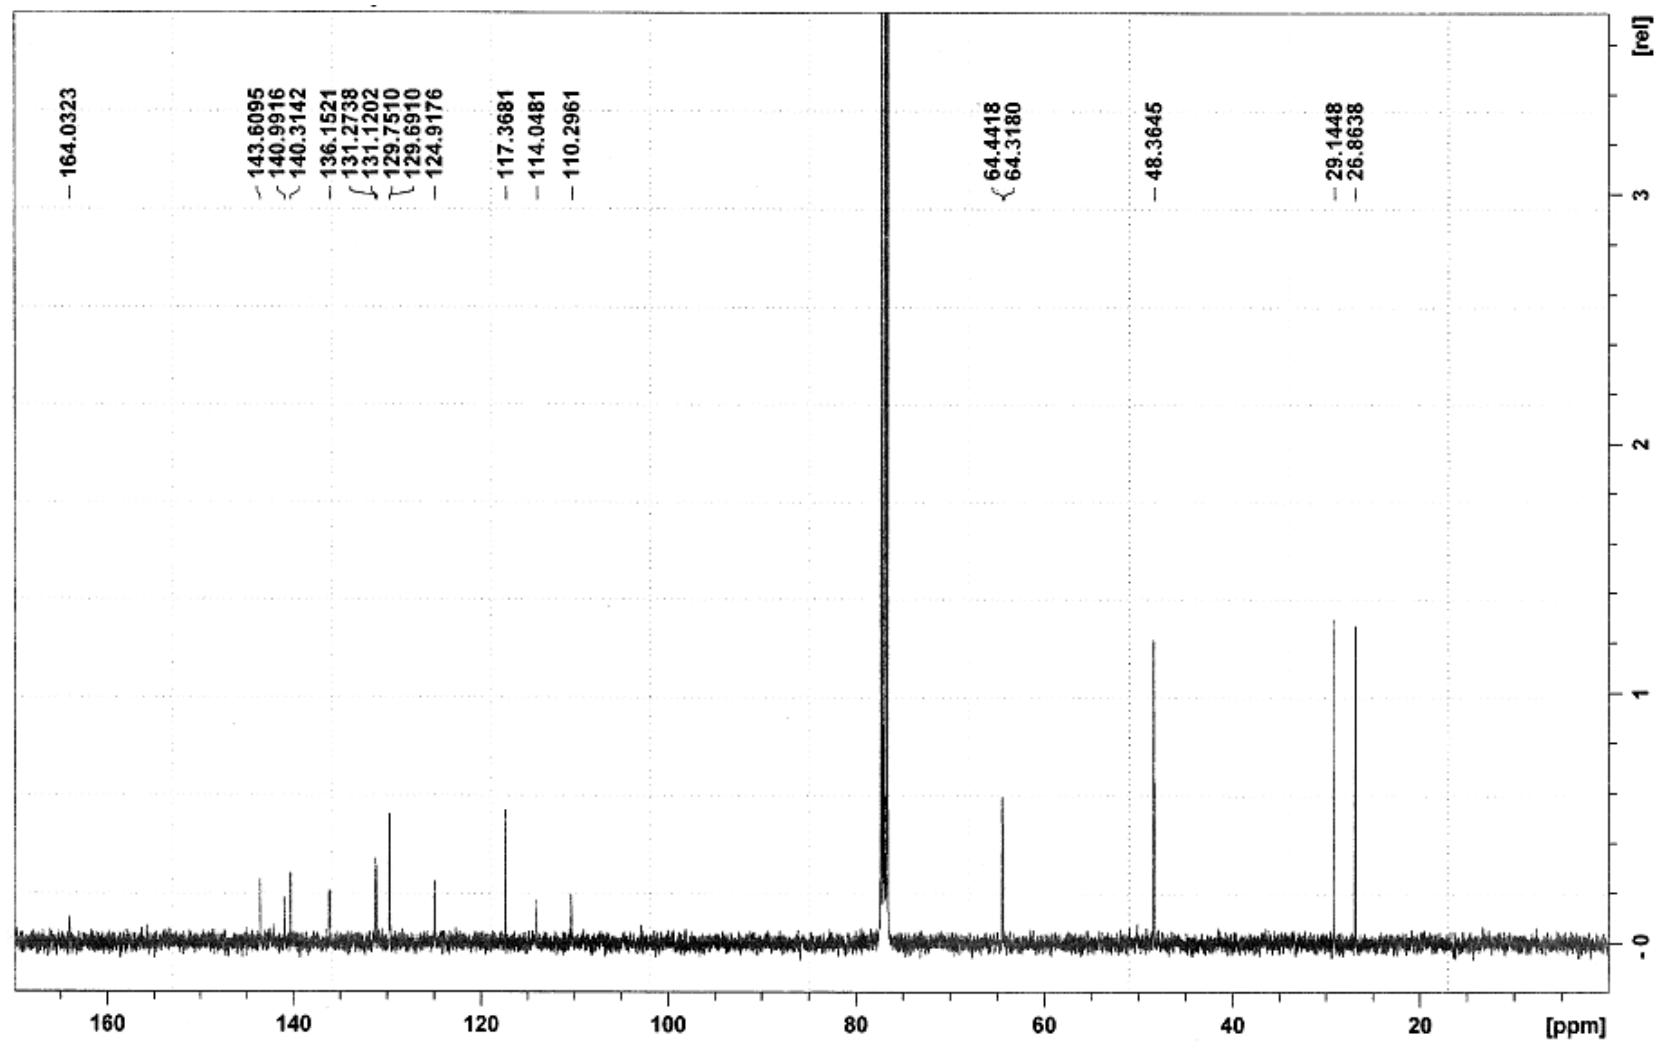

Compound **3ec**

$^1\text{H}$ -NMR

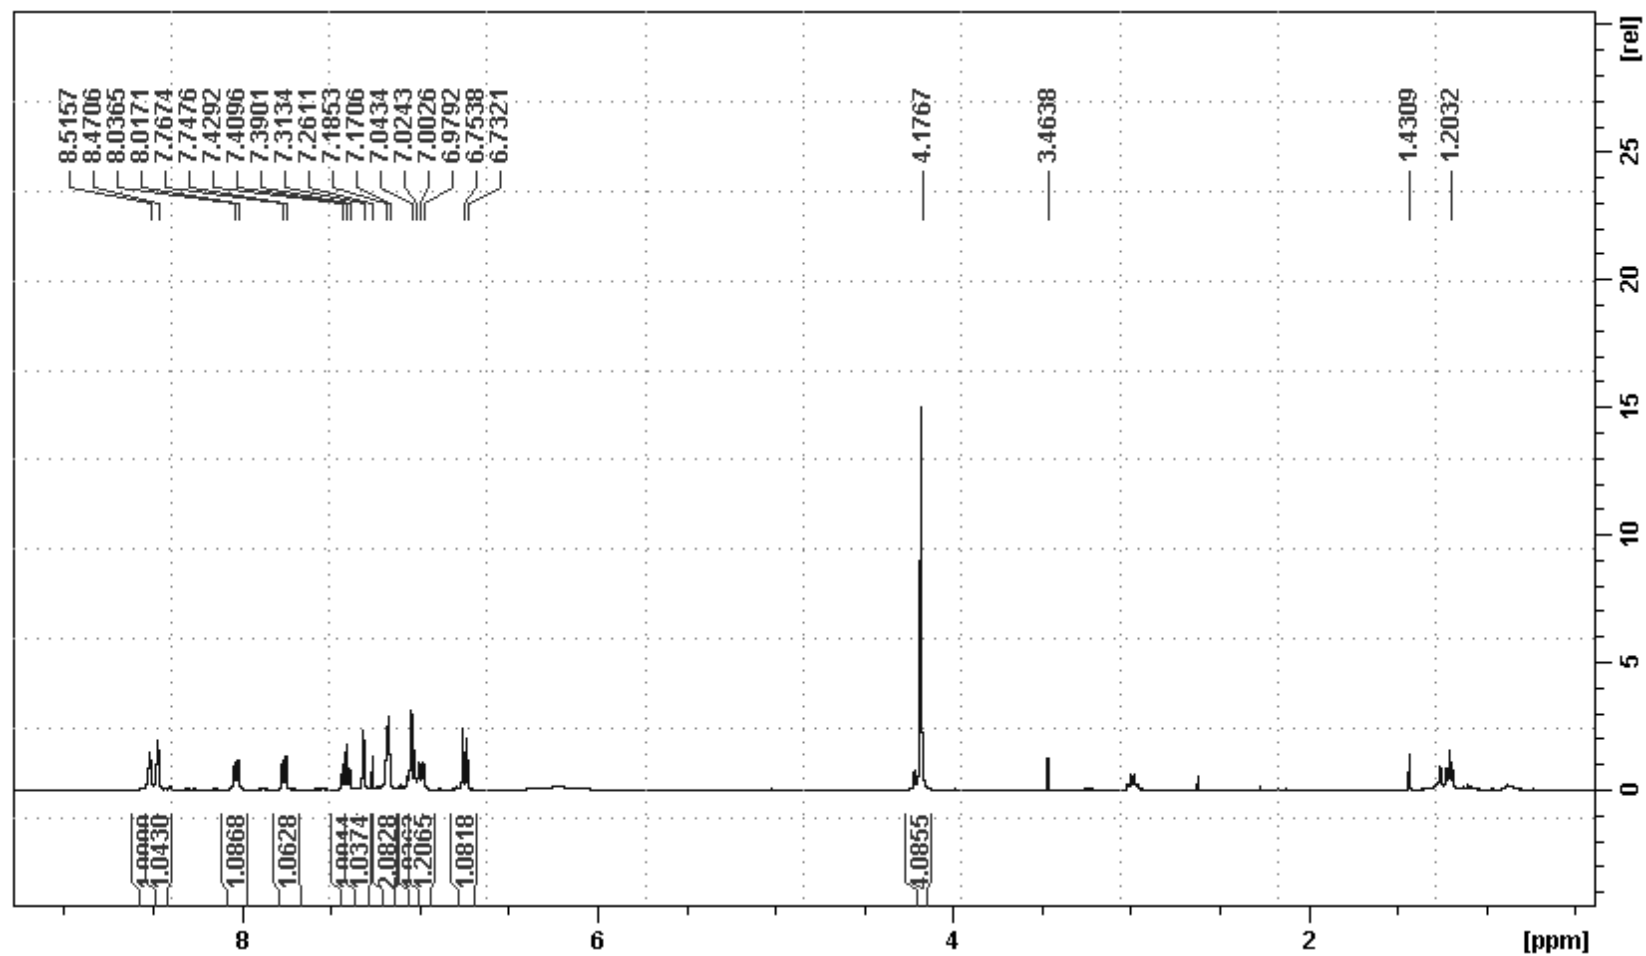

<sup>13</sup>C-NMR

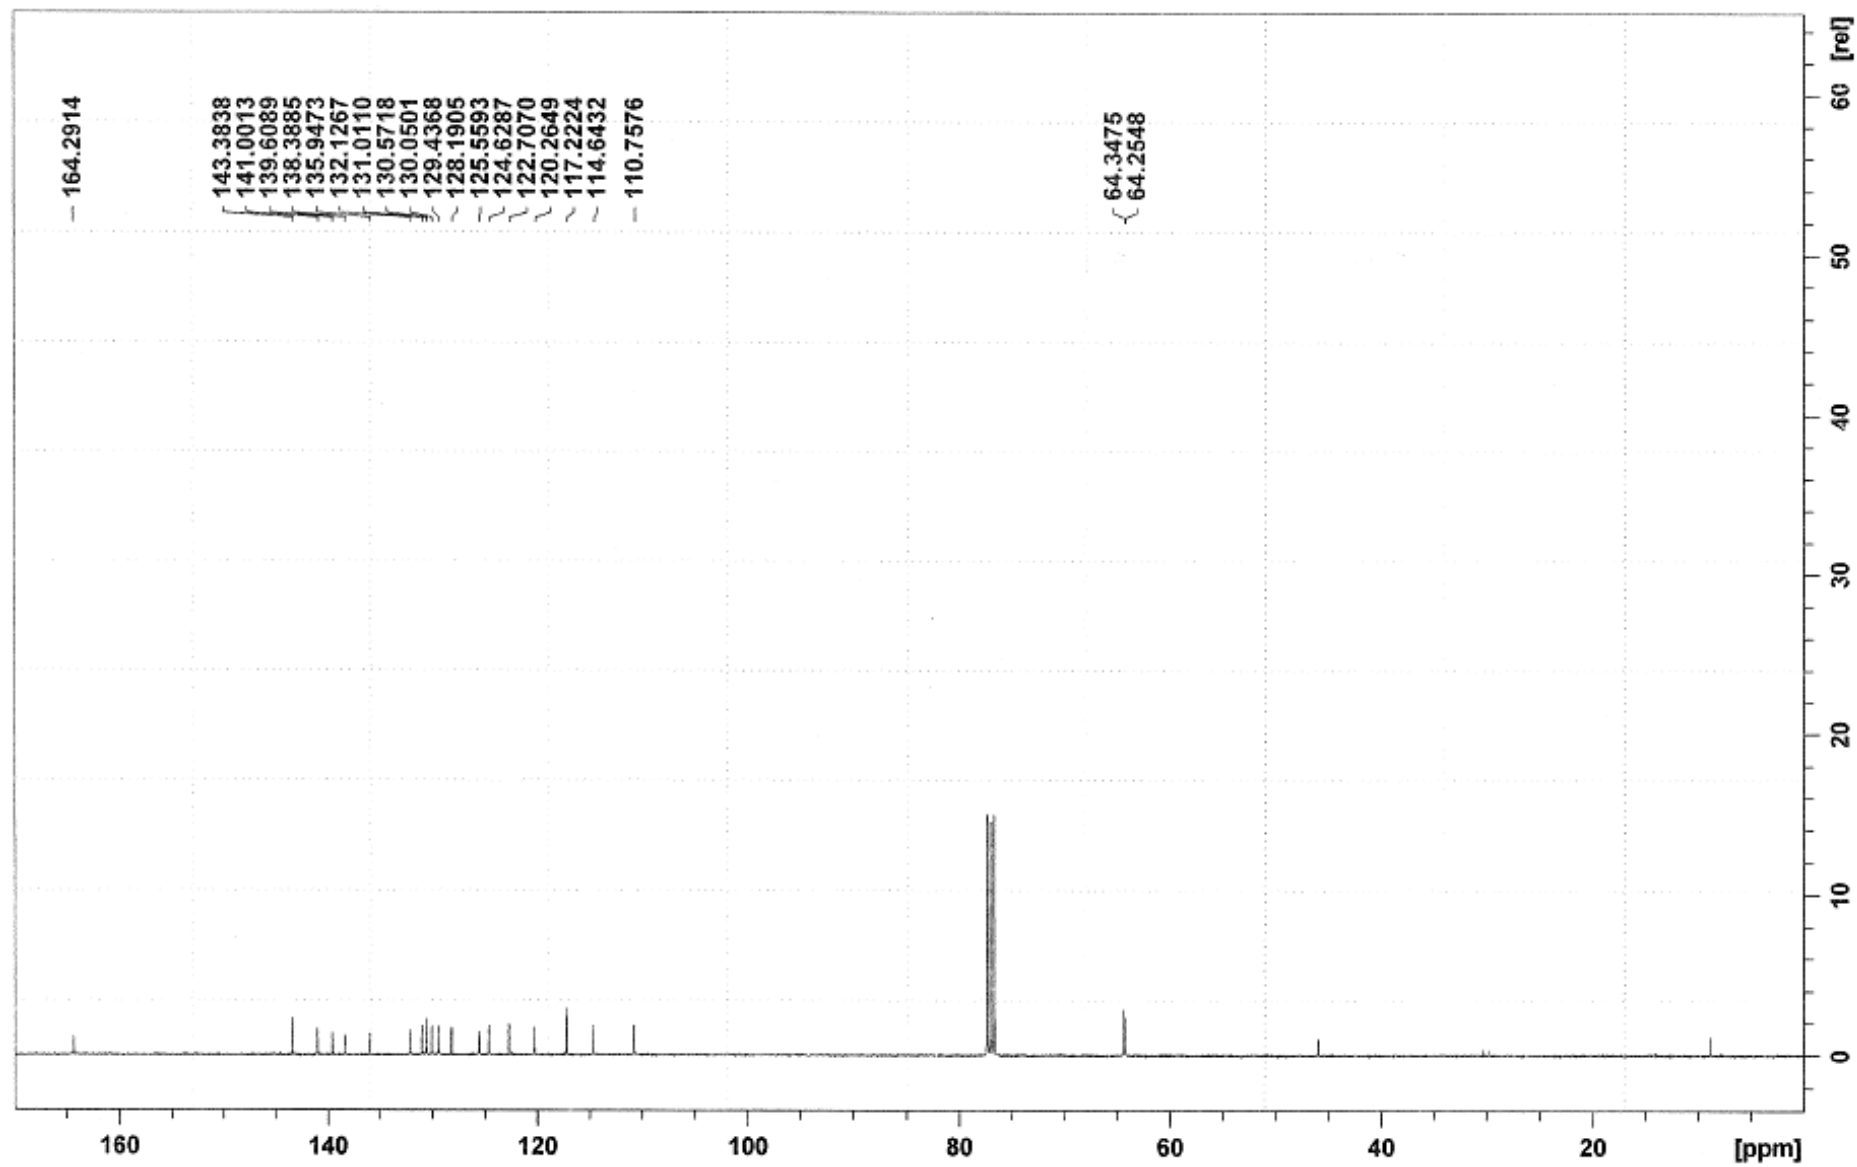

Compound **3ee**

$^1\text{H}$ -NMR

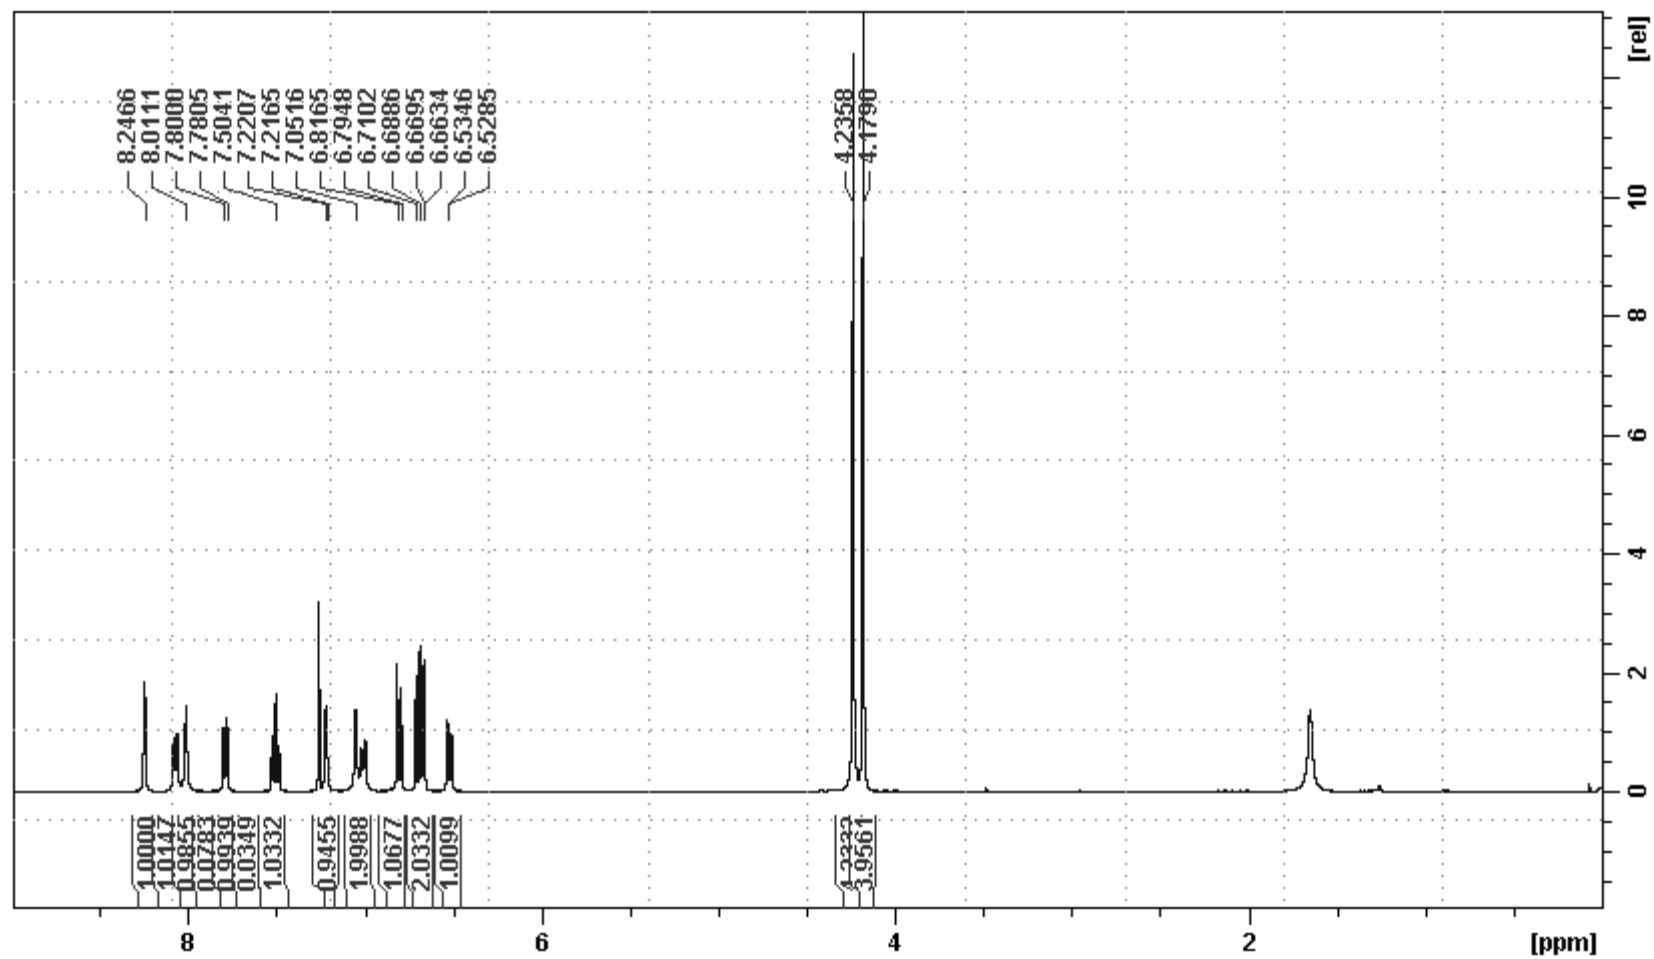

$^{13}\text{C}$ -NMR

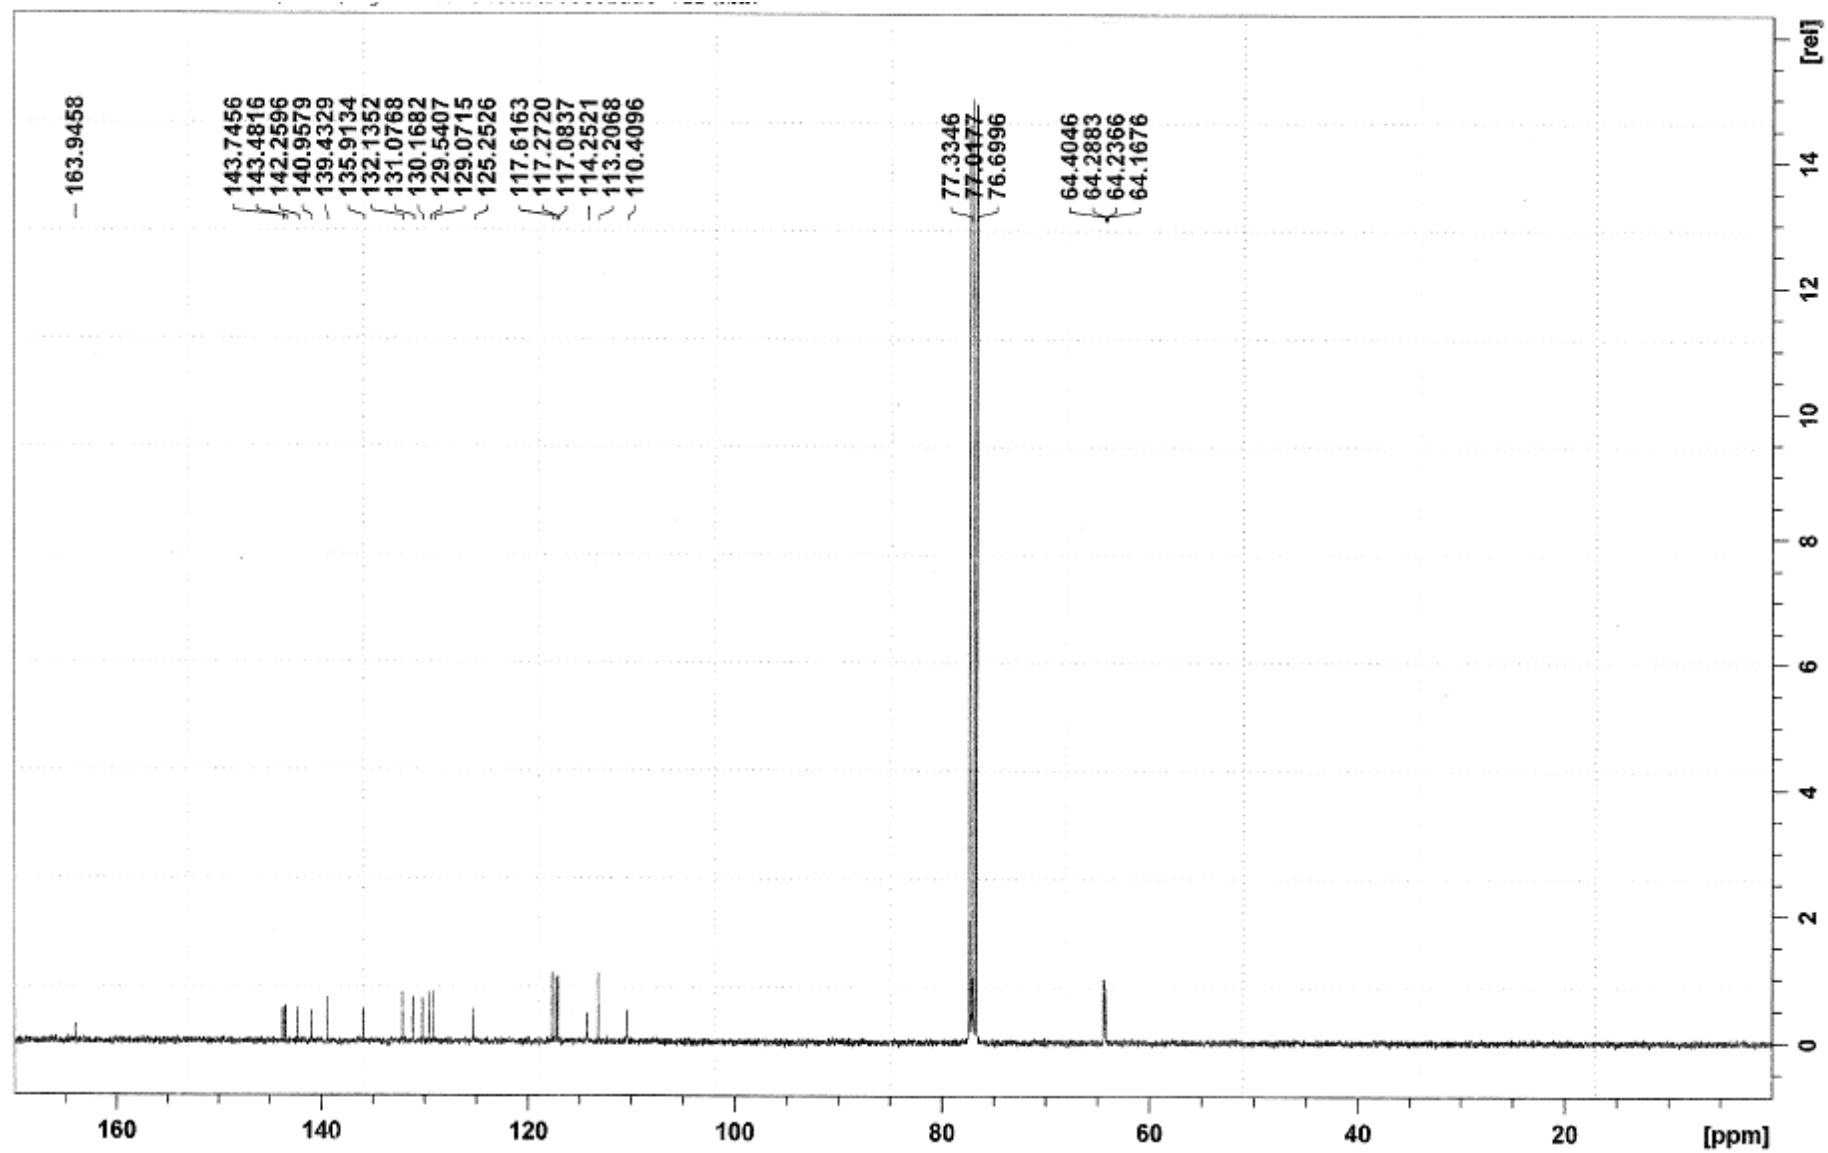



Compound **3eg**

$^1\text{H}$ -NMR

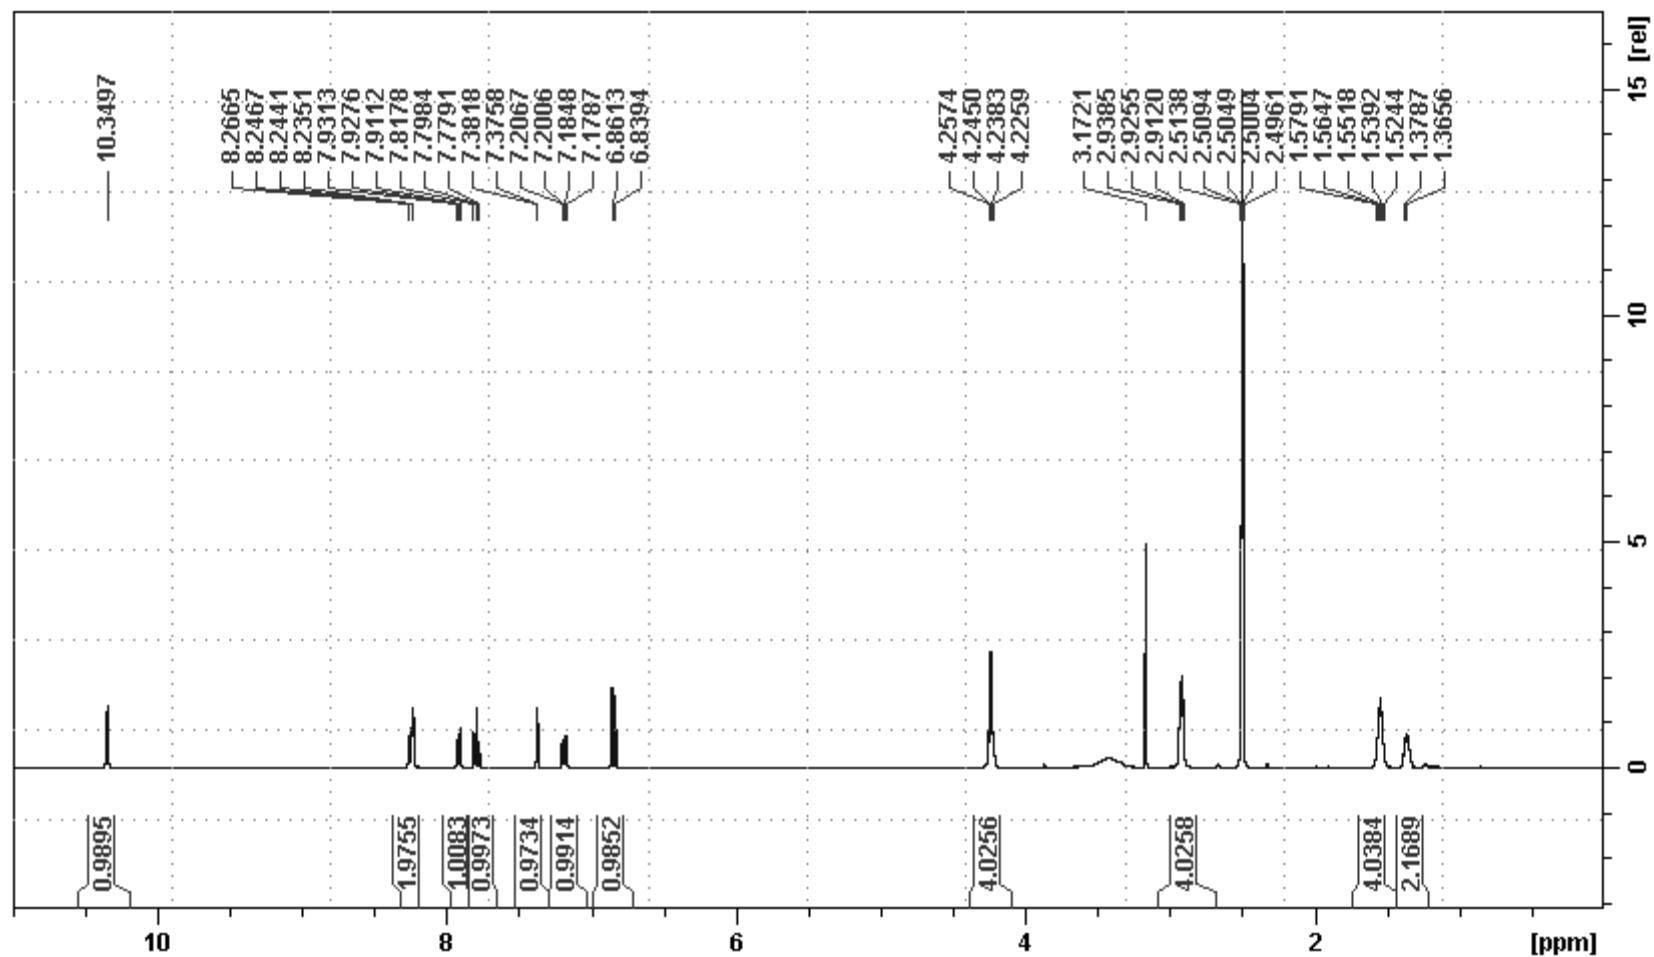

<sup>13</sup>C-NMR

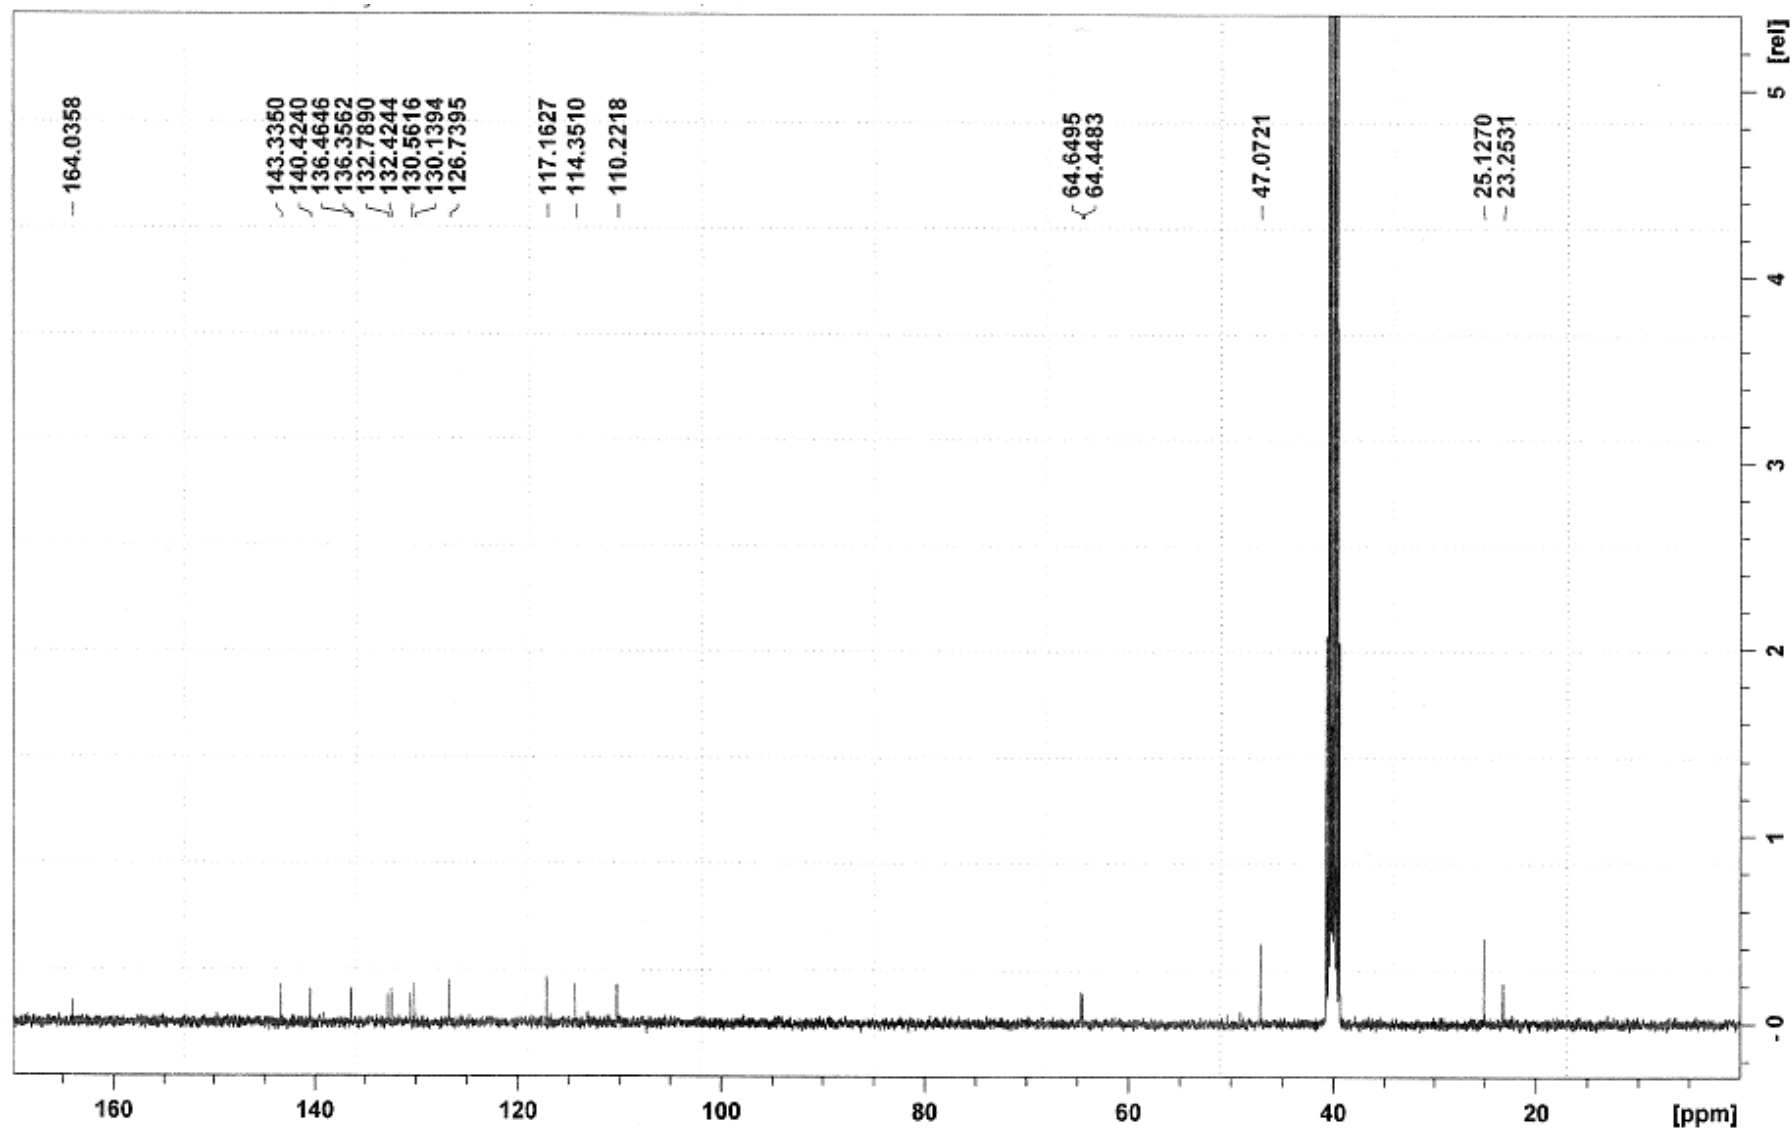

Supplement: Additional file 1 [file 1860-5397-13-33-S1.pdf]
